1  
2  
3  
4  
5  
6  
7  
8  
9  
10  
11  
12  
13  
14  
15  
16  
17  
18  
19  
20  
21  
22  
23  
24  
25  
26  
27  
28

## Architecture and evolution of the *cis*-regulatory system of the echinoderm *kirrell* gene

Jian Ming Khor, Jennifer Guerrero-Santoro, and Charles A. Ettensohn\*

Department of Biological Sciences, Carnegie Mellon University, Pittsburgh, PA USA

\*Corresponding author: Charles A. Ettensohn

Email: [ettensohn@cmu.edu](mailto:ettensohn@cmu.edu)

## 29 **Abstract**

30       The gene regulatory network (GRN) that underlies echinoderm skeletogenesis is  
31 a prominent model of GRN architecture and evolution. *KirreIL* is an essential downstream  
32 effector gene in this network and encodes an Ig-superfamily protein required for the fusion  
33 of skeletogenic cells and the formation of the skeleton. In this study, we dissected the  
34 transcriptional control region of the *kirreIL* gene of the purple sea urchin,  
35 *Strongylocentrotus purpuratus*. Using plasmid- and BAC-based transgenic reporter  
36 assays, we identified key *cis*-regulatory elements (CREs) and transcription factor inputs  
37 that regulate *Sp-kirreIL*, including direct, positive inputs from two key transcription factors  
38 in the skeletogenic GRN, Alx1 and Ets1. We next identified *kirreIL cis*-regulatory regions  
39 from seven other echinoderm species that together represent all classes within the  
40 phylum. By introducing these heterologous regulatory regions into developing sea urchin  
41 embryos we provide evidence of their remarkable conservation across ~500 million years  
42 of evolution. We dissected in detail the *kirreIL* regulatory region of the sea star, *Patiria*  
43 *miniata*, and demonstrated that it also receives direct inputs from Alx1 and Ets1. Our  
44 findings identify *kirreIL* as a component of the ancestral echinoderm skeletogenic GRN.  
45 They support the view that GRN sub-circuits, including specific transcription factor-CRE  
46 interactions, can remain stable over vast periods of evolutionary history. Lastly, our  
47 analysis of *kirreIL* establishes direct linkages between a developmental GRN and an  
48 effector gene that controls a key morphogenetic cell behavior, cell-cell fusion, providing  
49 a paradigm for extending the explanatory power of GRNs.

## 50 Introduction

51 Evolutionary changes in animal form have occurred through modifications to the  
52 developmental programs that give rise to anatomy. These developmental programs can  
53 be viewed as gene regulatory networks (GRNs, complex, dynamic networks of interacting  
54 regulatory (i.e., transcription factor-encoding) genes that determine the transcriptional  
55 states of embryonic cells (Peter and Davidson, 2015). Sea urchins and other echinoderms  
56 are prominent models for GRN biology for several reasons: (1) there are well-developed  
57 tools for dissecting developmental GRNs in these animals, (2) a large number of species  
58 that represent a wide range of evolutionary distances are amenable to study, and (3)  
59 there is a rich diversity of developmental modes and morphologies within the phylum  
60 (Arnone et al., 2016).

61 All adult echinoderms possess elaborate, calcified endoskeletons. Most species  
62 are maximal indirect developers; i.e., they develop via a feeding larva that undergoes  
63 metamorphosis to produce the adult. The feeding larvae of echinoids (sea urchins) and  
64 ophiuroids (brittle stars) have extensive endoskeletons, holothuroids (sea cucumbers)  
65 have rudimentary skeletal elements, and asteroids (sea stars) lack larval skeletal  
66 elements entirely. Larval skeletons are thought to be derived within the echinoderms as  
67 the feeding larvae of hemichordates (acorn worms), the sister group to echinoderms, and  
68 the larvae of crinoids (sea lilies and feather stars), a basal echinoderm clade, lack  
69 skeletons. The skeletal cells of larval and adult echinoderms are similar in many respects,  
70 supporting the widely accepted view that the larval skeleton arose via co-option of the  
71 adult skeletogenic program (Czarkwiani et al., 2013; Gao et al., 2015; Gao and Davidson,  
72 2008; Killian et al., 2010; Mann et al., 2010, 2008; Richardson et al., 1989).

73 The embryonic skeleton of euechinoid sea urchins, the best studied taxon, is  
74 formed by a specialized population of skeletogenic cells known as primary mesenchyme  
75 cells (PMCs). These cells are the progeny of the large micromeres (LMs), four cells that  
76 arise near the vegetal pole during early cleavage. The GRN that underlies PMC  
77 specification is one of the best characterized GRNs in any animal embryo (Oliveri et al.,  
78 2008; Shashikant et al., 2018a). This GRN is initially deployed through the activity of a  
79 localized maternal protein, Dishevelled, which stabilizes  $\beta$ -catenin in the LM lineage,  
80 leading to the early zygotic expression of a repressor, *pmar1/micro1* (Logan et al., 1999;  
81 Nishimura et al., 2004; Oliveri et al., 2002; Peng and Wikramanayake, 2013; Weitzel et  
82 al., 2004). These molecular events lead to the zygotic expression of several regulatory  
83 genes selectively in the LM-PMC lineage. Two of the most important of these regulatory  
84 genes are *alx1* (Ettensohn et al., 2003) and *ets1* (Kurokawa et al., 1999), each of which  
85 is required for PMC specification and morphogenesis.

86 After their specification, PMCs undergo a spectacular sequence of morphogenetic  
87 behaviors that includes epithelial-mesenchymal transition (EMT), directional cell

88 migration, cell fusion, and biomineral formation. PMCs undergo EMT at the late blastula  
89 stage, ingressing from the vegetal plate into the blastocoel. They migrate along the  
90 blastocoel wall and gradually arrange themselves in a ring-like pattern near the equator  
91 of the embryo. As they migrate, PMCs extend filopodia that fuse with those of neighboring  
92 PMCs, giving rise to a cable-like structure that joins the cells in a single, extensive  
93 syncytium. Beginning late in gastrulation and continuing throughout the remainder of  
94 embryogenesis, PMCs deposit calcified biomineral within the syncytial filopodial cable.

95 The complex sequence of PMC morphogenetic behaviors is regulated by hundreds  
96 of specialized effector proteins. The spatio-temporal expression patterns of these proteins  
97 are controlled by the GRN deployed in the LM-PMC lineage. A major current goal is to  
98 identify effector proteins that regulate specific PMC behaviors and elucidate the GRN  
99 circuitry that controls these genes (see Etensohn, 2013; Lyons et al., 2012). Dissection  
100 of the *cis*-regulatory elements (CREs) that control essential morphogenetic effector  
101 genes, including the identification of specific transcription factor inputs, would directly link  
102 them to the relevant circuitry and provide a GRN-level explanation of developmental  
103 anatomy. At present, we have only a limited understanding of the *cis*-regulatory control  
104 of three PMC effector genes: two genes (*sm30* and *sm50*) that encode secreted proteins  
105 occluded in the biomineral (Makabe et al., 1995; Walters et al., 2008) and a third gene  
106 (*cyclophilin/cyp1*) of unknown function (Amore and Davidson, 2006).

107 KirrelL is a PMC-specific, Ig domain-containing, transmembrane protein required  
108 for cell-cell fusion (Etensohn and Dey, 2017). In *kirrelL* morphants, PMCs extend  
109 filopodia and migrate but filopodial contacts do not result in fusion; this prevents the  
110 formation of the PMC syncytium and results in the secretion of small, unconnected  
111 biomineralized elements. In all echinoderms that have been examined, the *kirrelL* gene  
112 lacks introns, raising the possibility that its origin early in echinoderm evolution was a  
113 consequence of retrotransposition, a common gene transfer mechanism that results in  
114 intronless genes and one that has played a particularly prominent role in the  
115 diversification of Ig-domain-containing proteins (Baertsch et al., 2008; Cordaux and  
116 Batzer, 2009; Dermody et al., 2009; Farré et al., 2017). In sea urchins, *kirrelL* is expressed  
117 in a temporal and spatial pattern characteristic of many PMC effector genes. The gene is  
118 first expressed at the blastula stage (~18 hpf) and peaks in expression early in  
119 gastrulation (~30 hpf) (Tu et al., 2014). Expression then declines and is followed by a  
120 second peak at ~64 hpf, when *kirrelL* is expressed predominantly at sites of active skeletal  
121 rod growth as a consequence of localized, ectoderm-derived cues (Sun and Etensohn,  
122 2014). *Sp-kirrelL*, like many PMC effector genes, is positively regulated both by Alx1 and  
123 Ets1 (Rafiq et al., 2014). Although the gene has only been studied in detail in sea urchins,  
124 a recent study found that *kirrelL* is also expressed specifically in the embryonic  
125 skeletogenic mesenchyme of a brittle star, *Amphiura filiformis* (Dylus et al., 2018).

126           In the present study, we used plasmid- and BAC-based transgenic reporter assays  
127 to identify key *cis*-regulatory elements (CREs) and transcription factor inputs that regulate  
128 *kirreL* in the sea urchin, *Strongylocentrotus purpuratus*, directly linking this  
129 morphogenetic effector gene to the PMC GRN. In addition, we identified *kirreL cis*-  
130 regulatory regions in echinoderm species from all major clades within the phylum and  
131 found that these regulatory regions drove PMC-specific expression in developing sea  
132 urchin embryos, highlighting their striking conservation across 450-500 million years of  
133 evolution. We analyzed in detail the *kirreL* regulatory region of the sea star, *Patiria*  
134 *miniata*, and found that this gene, like *Sp-kirreL*, receives direct inputs from Alx1 and  
135 Ets1. Our findings identify *kirreL* as a component of the ancestral echinoderm  
136 skeletogenic GRN and strengthen the view that GRN sub-circuits, including specific  
137 transcription factor-CRE interactions, can remain stable over very long periods of  
138 evolutionary history.

## 139 Results

### 140 The sea urchin *Sp-kirrell* cis-regulatory landscape

141 We identified potential *Sp-kirrell* CREs based on several criteria. We considered  
142 whether candidate regions were (1) hyperaccessible in PMCs relative to other cell types,  
143 (2) bound by Alx1, a key transcription factor in the PMC GRN and a positive regulator of  
144 *Sp-kirrell*, (3) associated with active enhancer RNA (eRNA) expression, and (4)  
145 evolutionary conserved. In a previous study, ATAC-seq and DNase-seq were used to  
146 identify regions of chromatin that are differentially accessible in PMCs relative to other  
147 cell types at the mesenchyme blastula stage (Shashikant et al., 2018b). ChIP-seq was  
148 used to identify binding sites of Sp-Alx1 at the same developmental stage (Khor et al.,  
149 2019). Recently, we used Cap Analysis of Gene Expression Sequencing (CAGE-seq) to  
150 profile enhancer RNA (eRNA) expression at nine different stages of early sea urchin  
151 embryogenesis (Khor et al., 2021). Significantly, our integration of these different  
152 genome-wide datasets revealed several putative CREs located near *Sp-kirrell*, some of  
153 which were found to share several signatures (**Figure 1A**). Developmental CAGE-seq  
154 profiles of eRNAs also provided additional information regarding temporal patterns of  
155 CRE activity (**Figure 1B**). To assist in identifying candidate CREs regulating the spatio-  
156 temporal expression of *Sp-kirrell*, we used GenePalette (Smith et al., 2017) to perform  
157 phylogenetic footprinting of the *S. purpuratus* and *L. variegatus kirrell* gene loci. Based  
158 on cross-species sequence conservation, cell type-specific DNA accessibility, Sp-Alx1  
159 binding, and eRNA expression, we divided the intergenic sequences flanking *Sp-kirrell*  
160 into 9 putative CREs (labeled elements A-K) (**Figure 1C**). The elements were between  
161 1.0 to 2.4 kb in size, with an average size of 1.5 kb.

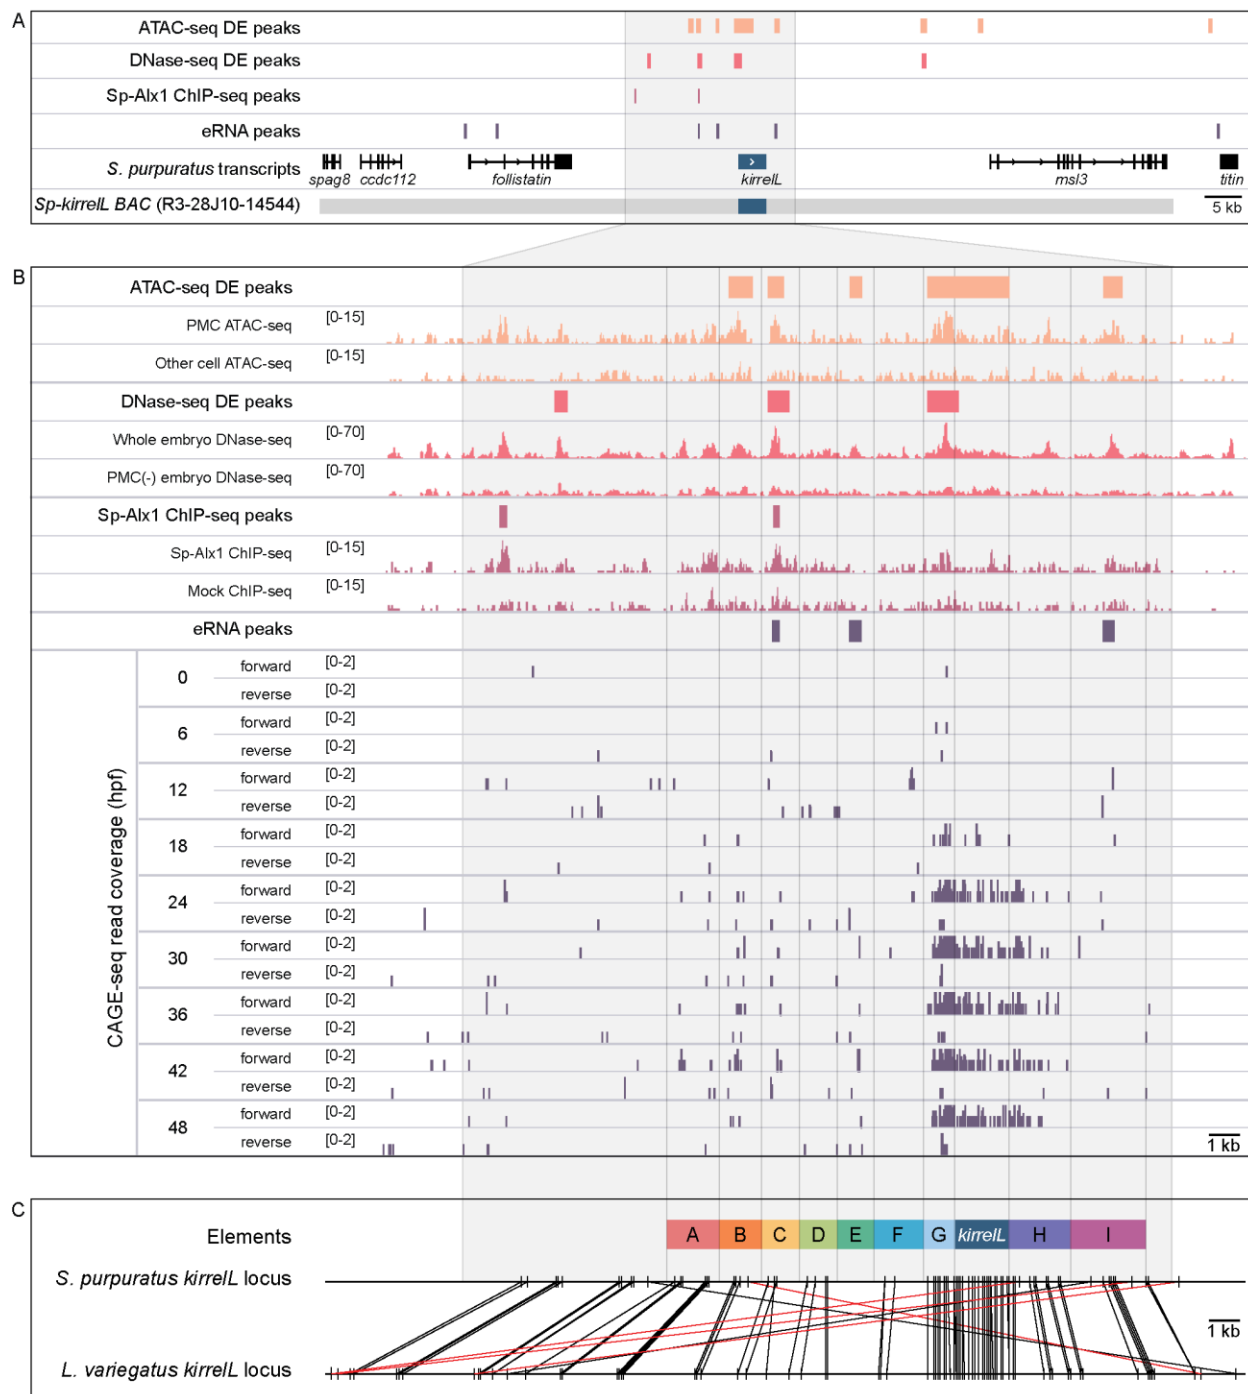

162

163 **Figure 1:** Characterization of the transcriptional regulatory landscape surrounding the *S.*  
 164 *purpuratus kirreIL* (*Sp-kirreIL*) locus. (A) Diagram of the *Sp-kirreIL* locus showing neighboring  
 165 genes, regions of chromatin differentially accessible in primary mesenchyme cells (PMCs)  
 166 (ATAC-seq DE peaks and DNase-seq DE peaks) (Shashikant et al., 2018), Sp-Alx1 binding sites  
 167 (Sp-Alx1 ChIP-seq peaks) (Khor et al., 2019), and eRNA peaks (Khor et al., 2021). (B) Signal  
 168 obtained from each assay in the vicinity of the *Sp-kirreIL* locus. (C) Phylogenetic footprinting of  
 169 genomic sequences near *S. purpuratus* and *L. variegatus kirreIL* ( $\pm 10$  kb of an exon) using

170 GenePalette. Black lines indicate identical sequences of 15 bp or longer in the same orientation  
171 while red lines indicate identical sequences of 15 bp or longer in the opposite orientation. 9  
172 putative CREs (labeled elements A-I) were identified based on sequence conservation and  
173 chromatin signatures.

174

175 Characterization of functional *Sp-kirrell* cis-regulatory elements

176 To test the transcriptional activity of the candidate cis-regulatory elements (**Figure**  
177 **2A**), we cloned them individually or in combination into the *EpGFPII* reporter plasmid,  
178 which contains a weak, basal sea urchin promoter, derived from the *Sp-endo16* gene,  
179 upstream of GFP (see Materials and Methods) and injected them into fertilized eggs. We  
180 observed that a GFP reporter construct containing upstream elements A to G  
181 recapitulated the correct spatial expression pattern of endogenous *Sp-kirrell* with minimal  
182 ectopic expression (**Figure 2B,C and Supplemental Table S1**). Further dissections  
183 revealed that a reporter construct containing elements D, E, F, and G also drove strong  
184 GFP expression specifically in PMCs while a construct consisting of elements A, B, and  
185 C showed weak GFP expression in PMCs. When elements were tested individually, we  
186 found that only elements C and G were able to drive GFP expression in sea urchin  
187 embryos. Element G, which is directly upstream of the *Sp-kirrell* translational start site  
188 and contains part of the *Sp-kirrell* 5' untranslated region (UTR), was observed to drive  
189 strong GFP expression specifically in the PMCs. Element C was also observed to drive  
190 GFP expression specifically in the PMCs, albeit much at lower levels than element G.



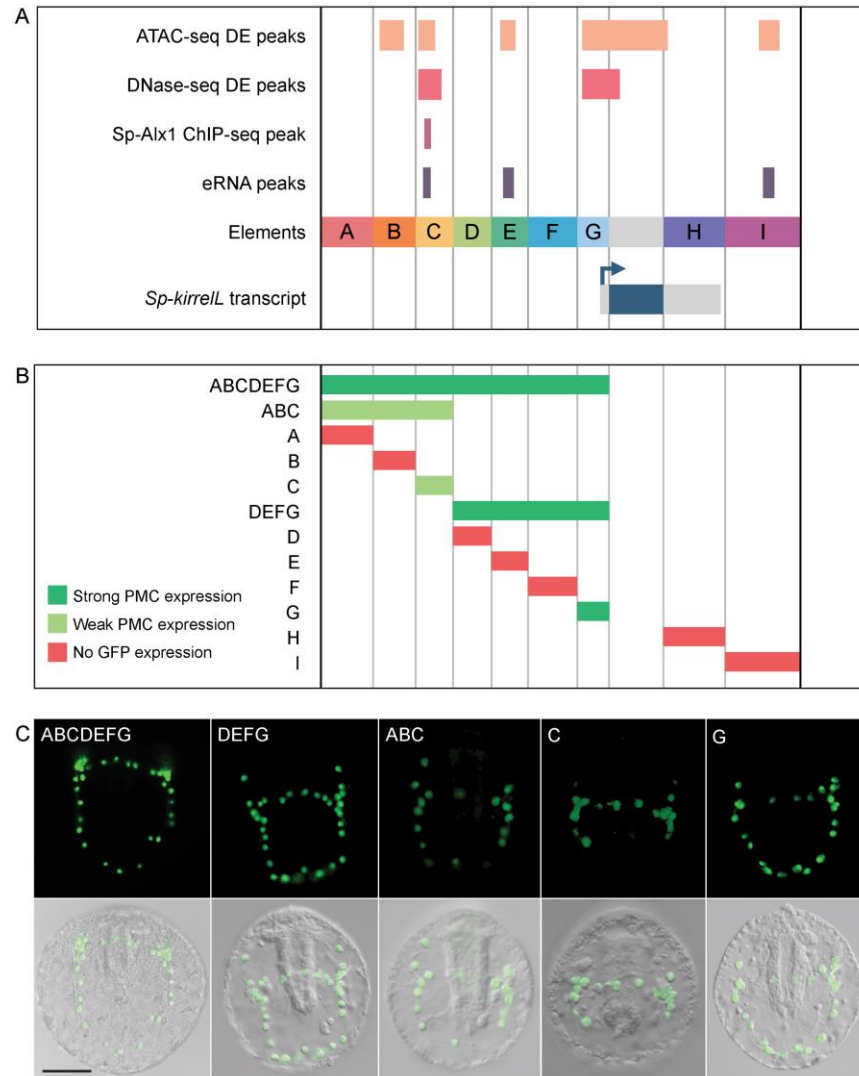

191

192 **Figure 2:** Functional analysis of non-coding genomic sequences flanking *Sp-kirreL* to identify *cis*-  
 193 regulatory elements (CREs). (A) 9 putative CREs (labeled elements A-K) were identified based  
 194 on sequence conservation and previously published datasets (Khor et al., 2021, 2019; Shashikant  
 195 et al., 2018b). (B) Summary of GFP expression regulated by putative CREs, as assessed by  
 196 transgenic reporter assays. Strong PMC expression is defined as >15% of total injected embryos  
 197 expressing GFP, with most exhibiting expression in PMCs only. Weak PMC expression is defined  
 198 as <15% of total injected embryos expressing GFP, with most exhibiting expression in PMCs only.  
 199 (C) Spatial expression patterns of GFP reporter constructs containing different *Sp-kirreL*  
 200 elements at 48 hours post fertilization (hpf). Top row: GFP fluorescence. Bottom row: GFP  
 201 fluorescence overlaid onto differential interference contrast (DIC) images. Scale bar: 50  $\mu$ m.

## 202 Identification of direct transcriptional inputs into element C

203 We next focused on the molecular dissection of element C to identify direct  
204 transcriptional inputs into this CRE. Element C is noteworthy as it is differentially  
205 accessible in the PMCs based on both ATAC-seq and DNase-seq, bound by Sp-Alx1,  
206 and associated with eRNA expression (**Figure 3A**). We first performed a detailed  
207 dissection of element C to identify the minimal region that supported strong, PMC-specific  
208 GFP expression. We found that a reporter construct containing element C alone showed  
209 relatively weak reporter activity, similar to the construct containing elements A, B, and C  
210 (**Figure S1A**). In contrast, a larger, overlapping CRE we termed BC.ATAC, which  
211 included part, but not all, of element C, exhibited strikingly enhanced GFP expression in  
212 PMCs. This difference in activity between element C and BC.ATAC suggested that  
213 element C might contain regulatory sites that have greater activity when in close proximity  
214 to the promoter.

215 To explore this further, we generated several reporter constructs consisting of  
216 truncated forms of element C, with boundaries defined by peaks from ATAC-seq  
217 (C.ATAC), DNase-seq (C.DNase), and Sp-Alx1 ChIP-seq (C.ChIP). The minimal element  
218 C region that showed strong, PMC-specific activity was determined to be C.ChIP.  
219 Increasing the distance between the C.ChIP element and the promoter (as in the  
220 C.DNase construct) significantly reduced enhancer activity. To predict transcription factor  
221 inputs within C.ChIP, we scanned the 200 bp C.ChIP sequence using JASPAR (Mathelier  
222 et al., 2016), with a focus on transcription factors known to be differentially expressed in  
223 the PMCs. This analysis identified several candidate Alx1 and Ets1 binding sites (**Figure**  
224 **3B and Figure S1B,C**). Consistent with previous RNA-seq analysis which has shown that  
225 *Sp-kirreLL* is sensitive to *alx1* and *ets1* knockdowns (Rafiq et al., 2014), our mutational  
226 analysis of C.ChIP revealed that mutations of all putative Alx1 and/or Ets1 binding sites  
227 completely abolished GFP expression (**Figure 3C and Figure S1D**). In contrast,  
228 constructs containing mutations in putative Fox or Meis binding sites exhibited reporter  
229 activity similar to that of the parental construct. Mutations of individual Alx1 and Ets1 sites  
230 revealed that Alx1 half site 2 and Ets1 site 1 provided key regulatory inputs.

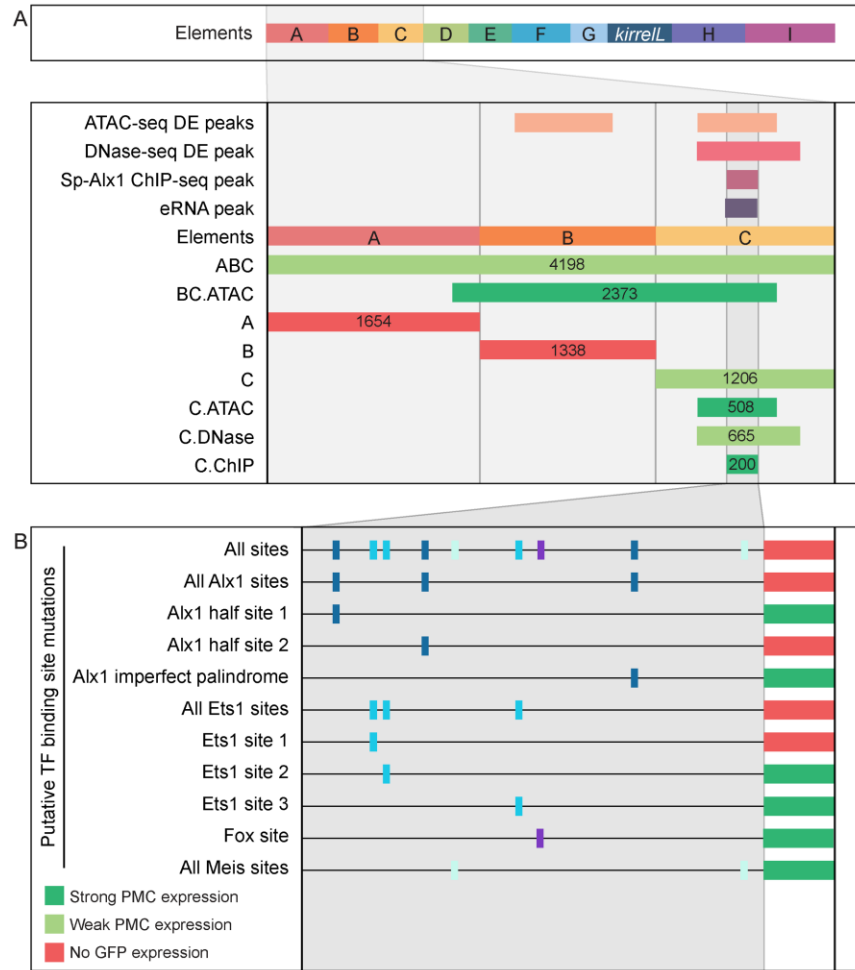

231

232 **Figure 3:** Molecular dissection of element C and the identification of direct transcriptional inputs.  
 233 (A) Summary of GFP expression regulated by element C truncations using reporter constructs.  
 234 Serial truncation of element C was performed based on boundaries of peaks defined by chromatin  
 235 accessibility, Sp-Alx1 binding, and eRNA expression. (B) Summary of GFP expression driven by  
 236 C.ChIP element mutants. Criteria for strong and weak PMC expression are defined in Figure 2.

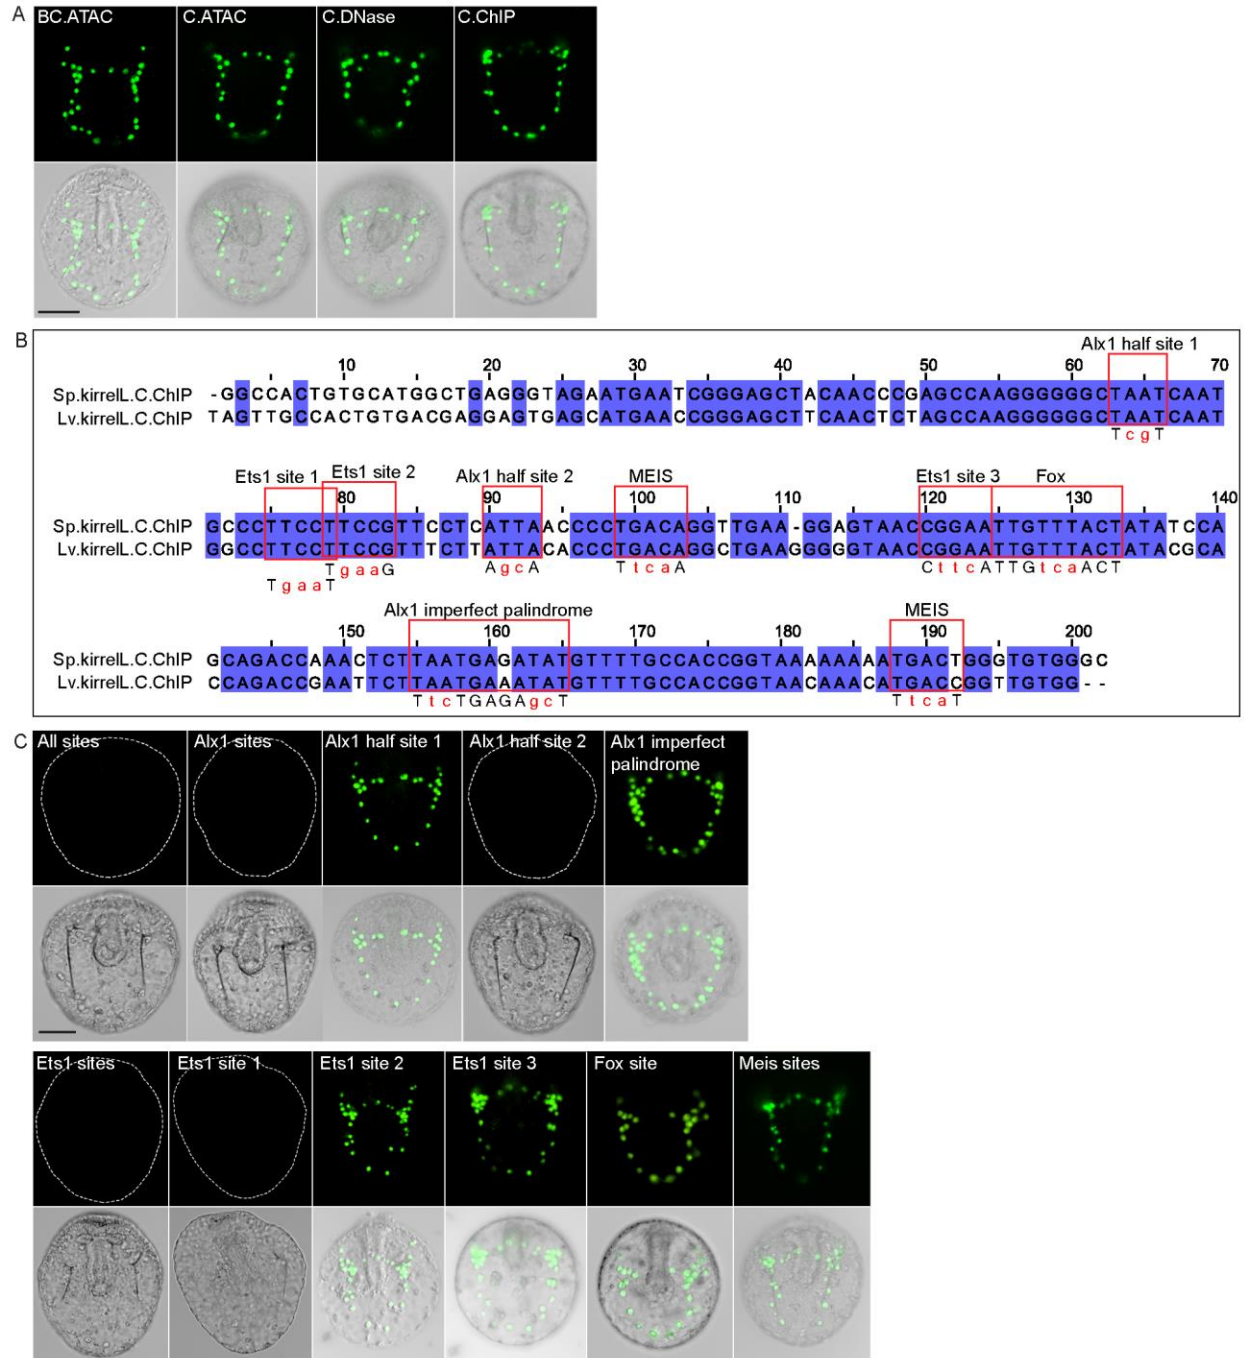

237

238 **Figure S1:** Element C truncation and mutational analysis. (A) Spatial expression patterns of GFP  
 239 reporter constructs containing different element C truncations at 48 hpf. (B) Cluster Omega  
 240 alignment of *Sp-kirreL* and *Lv-kirreL* C.ChIP sequences. Violet shading indicates conserved  
 241 sequences. Red boxes highlight putative transcription factor binding sites. (C) Spatial expression  
 242 patterns of GFP reporter constructs containing different C.ChIP element mutants at 48 hpf. Dotted  
 243 lines show outline of embryos that did not show GFP expression. Top rows: GFP fluorescence.  
 244 Bottom rows: GFP fluorescence overlaid onto DIC images. Scale bar: 50  $\mu$ m.

245 Analysis of the *Sp-kirreLL* promoter (Element G)

246 To characterize the native *Sp-kirreLL* promoter, we performed a detailed dissection  
247 of element G, which contains sequences directly upstream of the *Sp-kirreLL* translational  
248 start site, including the region encoding the *Sp-kirreLL* the 5' UTR (**Figure 4A and Figure**  
249 **S2A**). We found that a 301 bp region surrounding the transcriptional start site, a region  
250 we considered to be the *Sp-kirreLL* promoter, was able to drive GFP expression in sea  
251 urchin embryos. The majority of expressing embryos, however, exhibited ectopic GFP  
252 expression, suggesting that *Sp-kirreLL* core promoter is a strong, ubiquitous promoter. We  
253 next performed mutational analysis of the minimal element G fragment that drove  
254 strongest PMC-specific GFP expression (G.ATAC). We determined that this CRE  
255 receives direct and positive inputs from Alx1 and Ets1, similar to the C.ChIP element  
256 (**Figure 4B and Figure S3A,B**). Reporter constructs with mutated Cebpa, Fos::Jun, Fox,  
257 Meis, and Tbrain binding sites exhibited similar PMC-specific GFP expression similar to  
258 that of the parental construct. We also injected the different *Sp-kirreLL* element G  
259 truncations into fertilized *L. variegatus* eggs and observed similar expression patterns,  
260 indicating that inputs into element G are conserved in these two sea urchin species  
261 (**Figure S2B**).

262 Our analysis of the native *Sp-kirreLL* promoter prompted us to investigate whether  
263 the addition of this region to our *EpGFPII* reporter constructs would allow us to uncover  
264 interactions between CREs and the native promoter that would have otherwise been  
265 missed (**Figure S4A**). Strikingly, we found that elements B, C, E, F, H, and I were  
266 individually able drive strong PMC-specific GFP expression when cloned adjacent to the  
267 *Sp-kirreLL* promoter, although these elements had previously exhibited minimal activity in  
268 the context of the *Sp-endo16* promoter alone (**Figure 4C and Figure S4B**; compared to  
269 **Figure 2**). We also observed that the presence of the native *Sp-kirreLL* promoter mitigated  
270 the need for the C.ChIP element within element C to be adjacent to the promoter for  
271 strong PMC-specific GFP expression. We confirmed that enhancer activity was  
272 dependent on the sequence of the *Sp-kirreLL* promoter, as GFP expression was abolished  
273 in a construct where the sequence was shuffled (**Figure S4C,D**). Taken together, these  
274 findings showed that several CREs are capable of interacting specifically with the native  
275 *Sp-kirreLL* promoter and this interaction can bypass spacing hurdles that are evident when  
276 the *Sp-endo16* promoter alone is present.

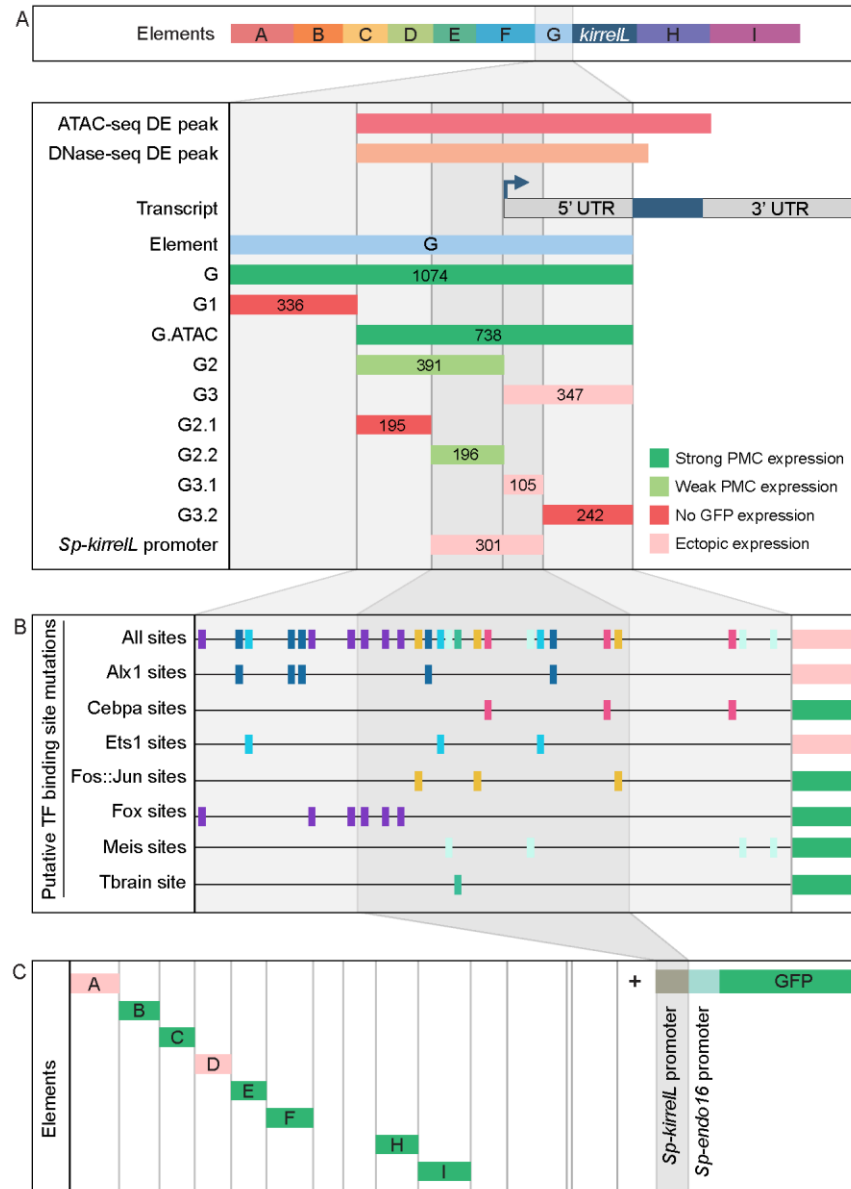

277

278 **Figure 4:** Molecular dissection and mutation of element G. (A) Summary of GFP expression  
 279 regulated by element G truncations using *EpGFPII* reporter constructs. Serial truncation of  
 280 element G was performed based on boundaries defined by chromatin accessibility and the *kirreL*  
 281 5' UTR. Criteria for strong and weak PMC expression are defined in Figure 2. Ectopic expression  
 282 is defined as >10% of total injected embryos expressing GFP, with a majority exhibiting  
 283 expression in cells other than PMCs. (B) Summary of GFP expression driven by G.ATAC element  
 284 mutants using *EpGFPII* reporter constructs. (C) Analysis of element enhancer activity in modified  
 285 *EpGFPII* reporter constructs containing the endogenous *Sp-kirreL* promoter elements.



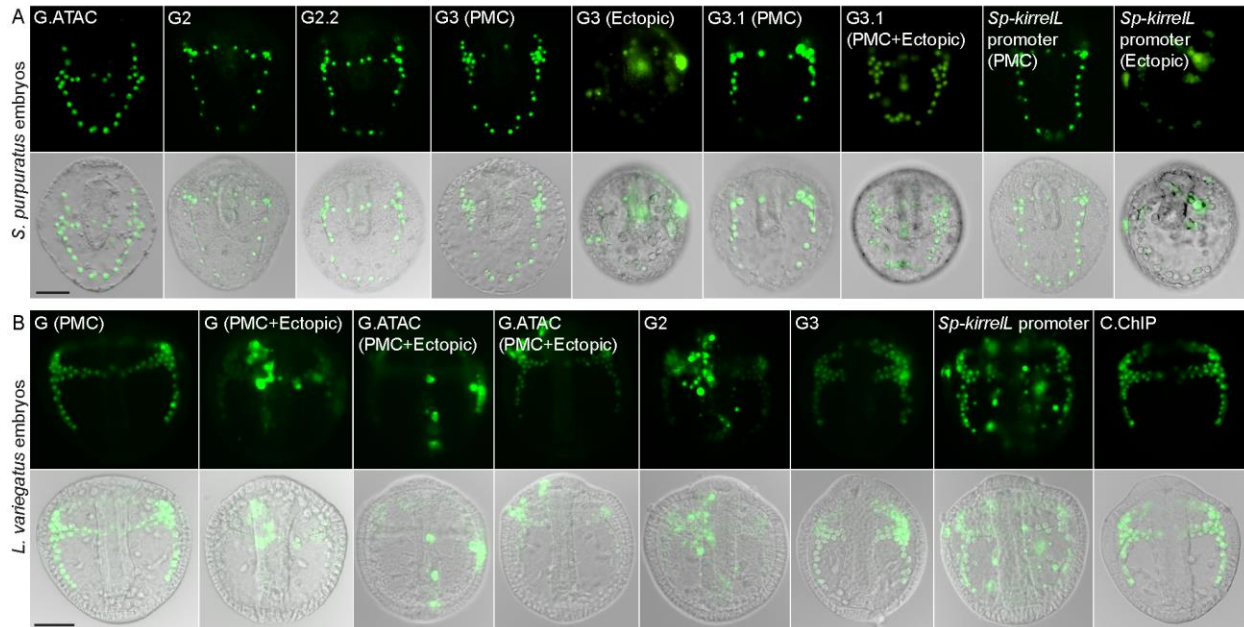

286

287 **Figure S2:** Element G truncation and mutational analysis. (A) Spatial expression patterns of GFP  
288 reporter constructs containing element G truncations in *S. purpuratus* embryos at 48 hpf. (B)  
289 Spatial expression patterns of GFP reporter constructs containing element G truncations in *L.*  
290 *variegatus* embryos at 28 hpf. Representative images of PMC-specific and ectopic GFP  
291 expression are shown for some constructs. Top rows: GFP fluorescence. Bottom rows: GFP  
292 fluorescence overlaid onto DIC images. Scale bar: 50  $\mu\text{m}$ .

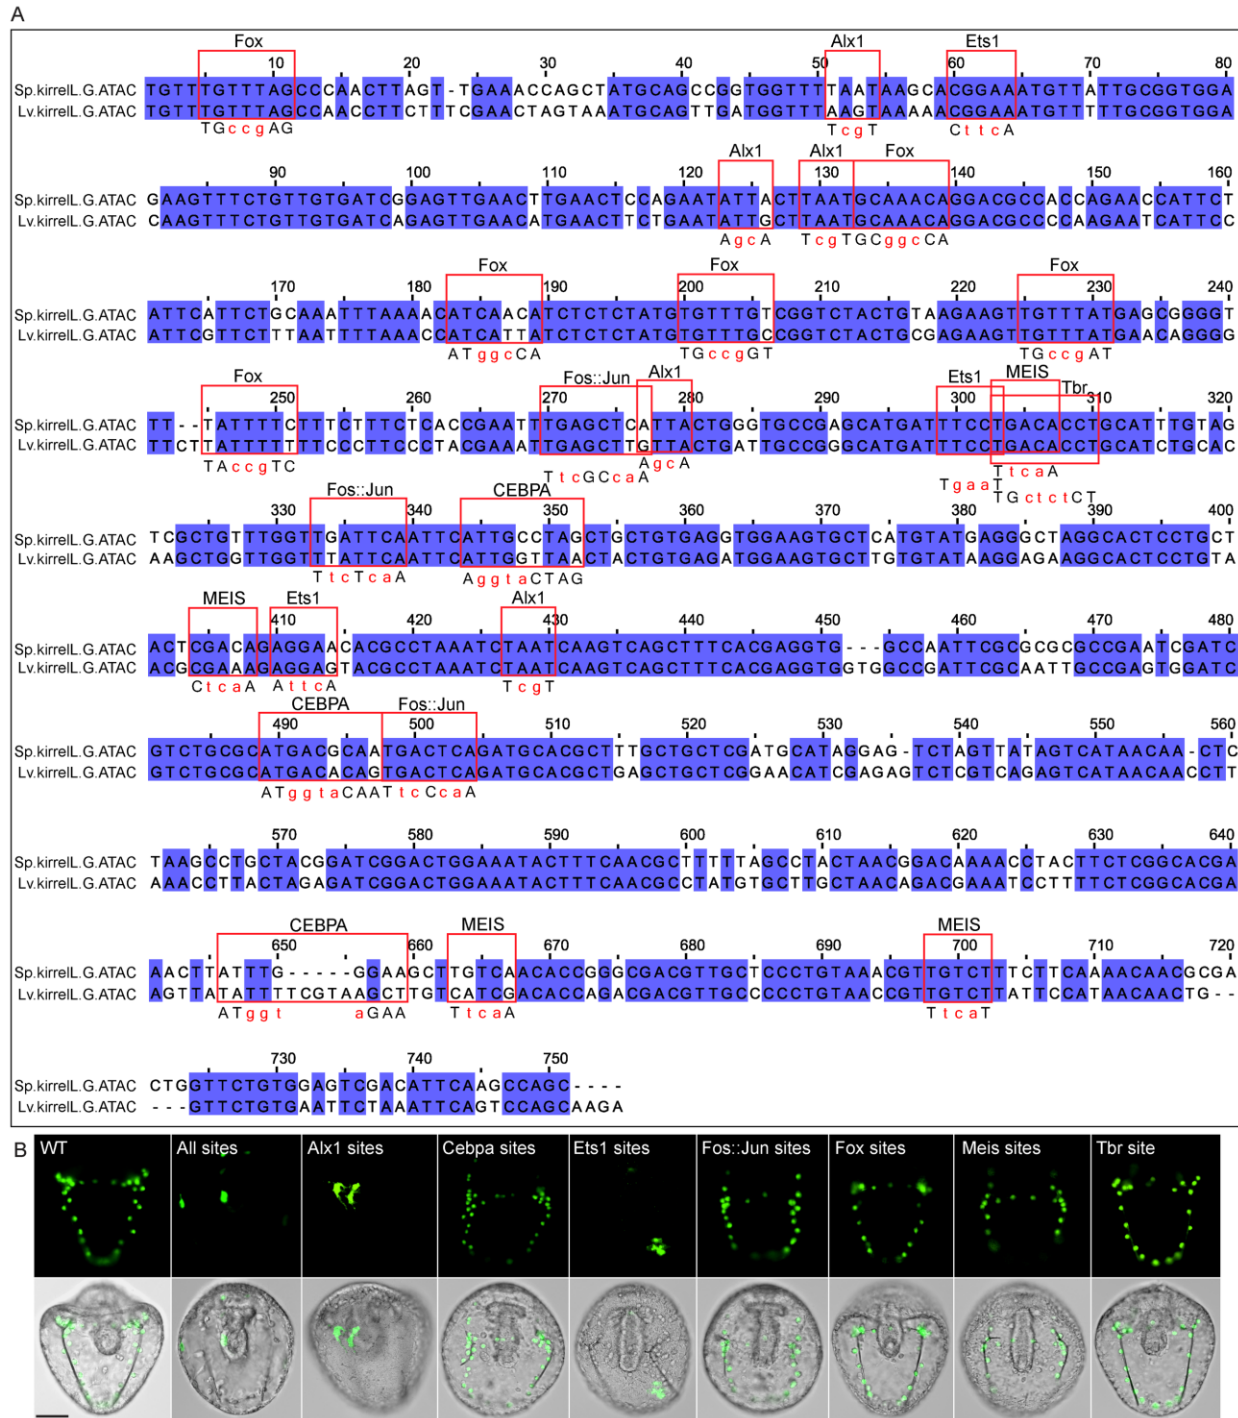

293

294 **Figure S3:** Mutational analysis of G.ATAC element. (A) Cluster Omega alignment of *Sp-kirrelL*  
 295 and *Lv-kirrelL* G.ATAC sequences. Violet shading indicates conserved sequences. Red boxes  
 296 highlight putative transcription factor binding sites. (B) Spatial expression pattern of GFP reporter  
 297 constructs containing different G.ATAC element mutants. Top row: GFP fluorescence. Bottom  
 298 row: GFP fluorescence overlaid onto DIC images. Scale bar: 50  $\mu$ m.



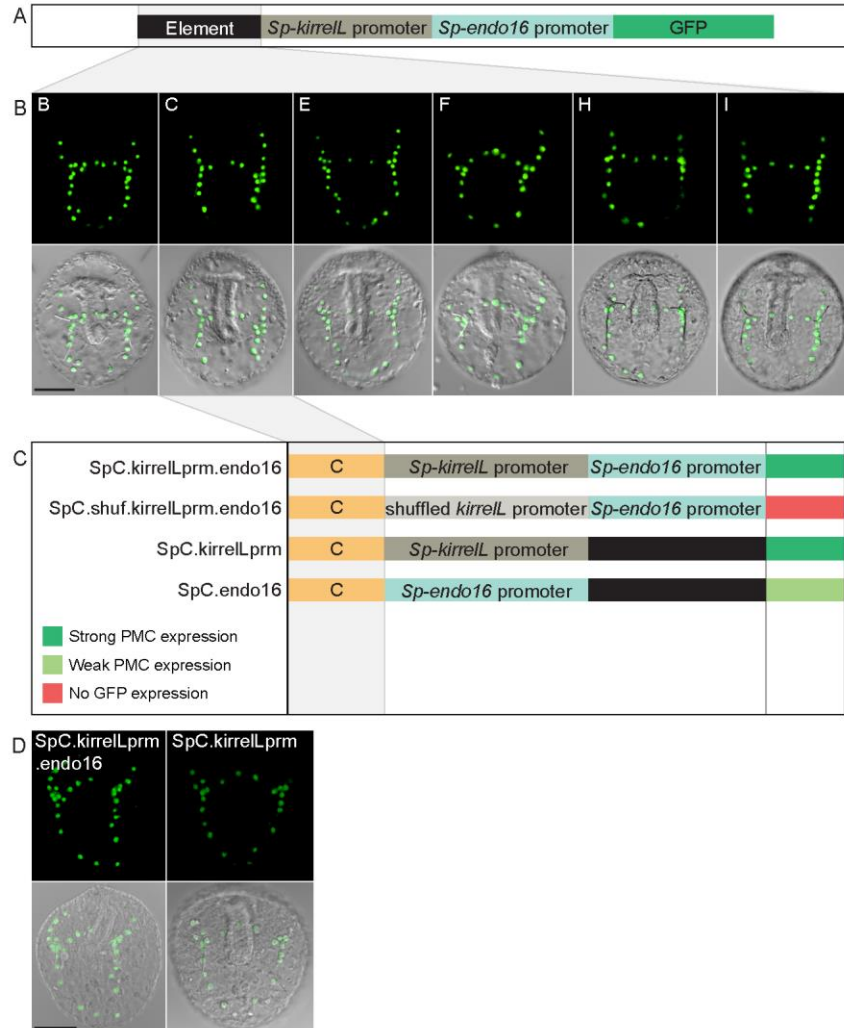

299

300 **Figure S4:** Interactions between *Sp-kirrelL* CREs and the endogenous *Sp-kirrelL* promoter. (A)  
 301 Diagram showing the backbone of a modified, *EpGFPII* reporter construct containing the  
 302 endogenous *Sp-kirrelL* promoter upstream of the *Sp-endo16* promoter. (B) Spatial expression  
 303 patterns of the modified GFP reporter constructs containing the various *Sp-kirrelL* elements  
 304 indicated (elements B, C, E, F, H, and I). (C) Summary of GFP expression patterns of control  
 305 constructs to determine whether element activity is dependent on the presence of the *Sp-kirrelL*  
 306 promoter. Criteria for strong and weak PMC expression are defined in Figure 2. (D) Spatial  
 307 expression patterns of GFP reporter constructs containing element C and the *Sp-kirrelL* promoter,  
 308 with or without the *Sp-endo16* promoter. Top rows: GFP fluorescence. Bottom rows: GFP  
 309 fluorescence overlaid onto DIC images. Scale bar: 50  $\mu$ m.

310 Relative contributions of individual CREs in the context of the entire *Sp-kirreLL* regulatory  
311 apparatus

312 Our analysis identified multiple CREs in the vicinity of the *Sp-kirreLL* locus that were  
313 capable of driving PMC-specific reporter expression when cloned into plasmids that  
314 contained the endogenous *Sp-kirreLL* promoter. To explore further the relative  
315 contributions of these various elements to *Sp-kirreLL* expression in vivo, we examined  
316 their function in the context of the complete transcriptional control system of the gene.  
317 For these studies, we utilized a 130 kb bacterial artificial chromosome (BAC) that  
318 contained the single exon *Sp-kirreLL* gene, flanked by 65 kb of sequences in each  
319 direction. We used recombination-mediated genetic engineering (recombineering) to  
320 replace the single *Sp-kirreLL* exon seamlessly with either GFP or mCherry coding  
321 sequence (**Figure 5A**). We found that *Sp.kirreLL*.GFP.BAC faithfully recapitulated the  
322 expression of endogenous *Sp-kirreLL* in the PMCs at 48 hpf with minimal ectopic  
323 expression (**Figure S5**). We next generated deletion mutants based on results from our  
324 plasmid GFP reporter assays to quantitatively assess the contributions of elements A to  
325 G to *Sp-kirreLL* transcriptional regulation. We found that deletion of elements A to G  
326 ( $\Delta$ CRE.GFP.BAC) completely abolished GFP expression. We also observed that  
327 retaining the minimal endogenous *Sp-kirreLL* promoter ( $\Delta$ CRE.kirreLLprm.GFP.BAC) did  
328 not rescue GFP expression, demonstrating that elements A to G are necessary for *Sp-*  
329 *kirreLL* expression in the context of the *Sp.kirreLL*.GFP.BAC consistent with our previous,  
330 plasmid-based analysis.

331 To directly compare the spatial expression patterns of deletion mutants with that  
332 of the parental BAC, we generated BAC mutants containing deletion of individual  
333 elements and co-injected them into fertilized eggs with a parental mCherry BAC. We  
334 found that a BAC containing deletion of the element G ( $\Delta$ G.GFP.BAC, which included a  
335 deletion of the *Sp-kirreLL* promoter) abolished GFP expression at 48 hpf (**Figure 5B and**  
336 **Figure S5**). By contrast, deletion of all of element G except for the promoter region  
337 ( $\Delta$ G.kirreLLpromoter.GFP.BAC), resulted in a GFP spatial expression pattern similar to  
338 that of the parental mCherry. These findings confirmed the importance of the *Sp-kirreLL*  
339 promoter in supporting PMC-specific expression of the gene and showed that this region  
340 is essential even when all distal CREs are present. BACs containing individual deletions  
341 of other elements all remained active at 48 hpf and supported PMC-specific reporter  
342 expression, pointing to considerable redundancy in the contribution of each element to  
343 *Sp-kirreLL* expression.

344 To examine the relative contribution of distal CREs more rigorously, we measured  
345 levels of reporter transcripts using a NanoString nCounter. For each mutant BAC, we co-  
346 injected embryos with mCherry tagged, parental BAC and the GFP-tagged, mutant BAC  
347 and quantified the expression level of each reporter gene at four time points (20, 30, 50,  
348 and 65 hpf) (**Figure 5C and Supplemental Table S2**). We found that deletion of element

349 C resulted in approximately a 50% reduction in expression compared to WT BAC. As we  
350 observed previously, GFP expression was completely abolished when element G was  
351 deleted ( $\Delta$ G.GFP.BAC) and this effect was diminished when the *Sp-kirreLL* promoter was  
352 retained ( $\Delta$ G.kirreLprm.GFP.BAC). Quantitative analysis revealed, however, that  
353 retention of the *Sp-kirreLL* promoter alone resulted in only a partial rescue of expression,  
354 with overall levels reduced substantially compared to the wild-type BAC. We also  
355 observed that deletion of element H resulted in decreased expression levels. Taken  
356 together, our qualitative and quantitative analyses show that at early stages of embryo  
357 development, *Sp-kirreLL* expression is controlled by multiple CREs, notably the C, G, and  
358 H modules, acting in concert with the *Sp-kirreLL* promoter.

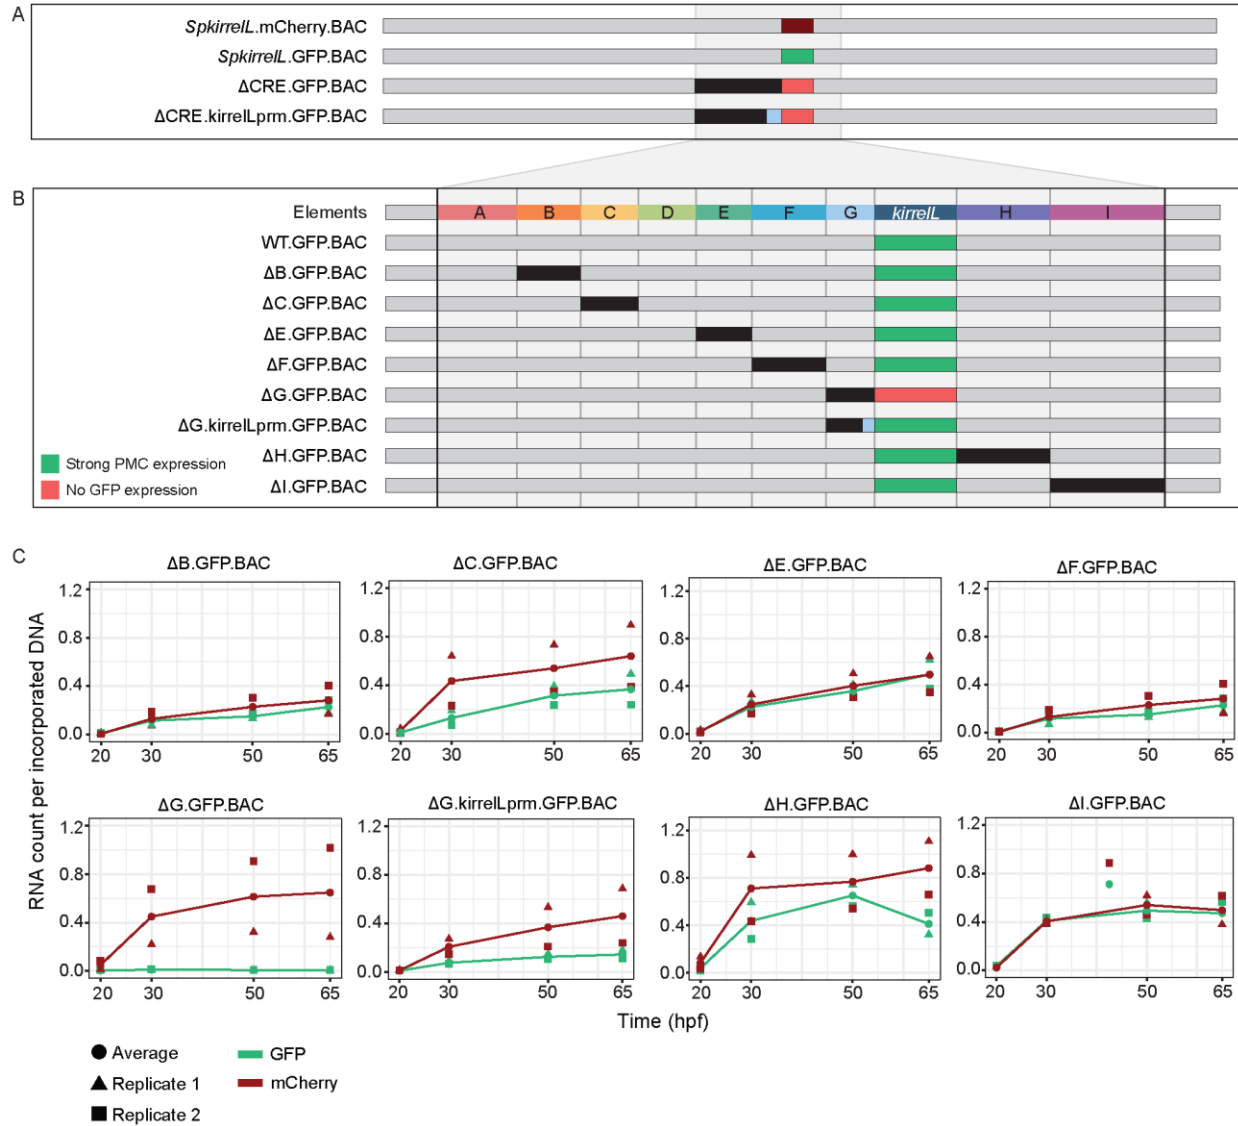

359

360 **Figure 5:** *Sp-kirrelL* cis-regulatory analysis using BACs. (A) BAC deletions show that elements  
 361 A-G are necessary for GFP expression, regardless of the presence of the endogenous *Sp-kirrelL*  
 362 core promoter elements. (B) Summary of GFP expression patterns of individual *Sp-kirrelL*  
 363 elements using GFP BAC deletions. Criteria for strong PMC expression are defined in Figure 2.  
 364 (C) Quantitative NanoString analysis of reporter expression in embryos co-injected with parental  
 365 mCherry and mutant GFP BACs. Embryos were collected at 20, 30, 50, and 65 hpf. The average  
 366 expression profile for each pair of BAC injection was calculated from NanoString counts of two  
 367 biological replicates (see Materials and Methods).

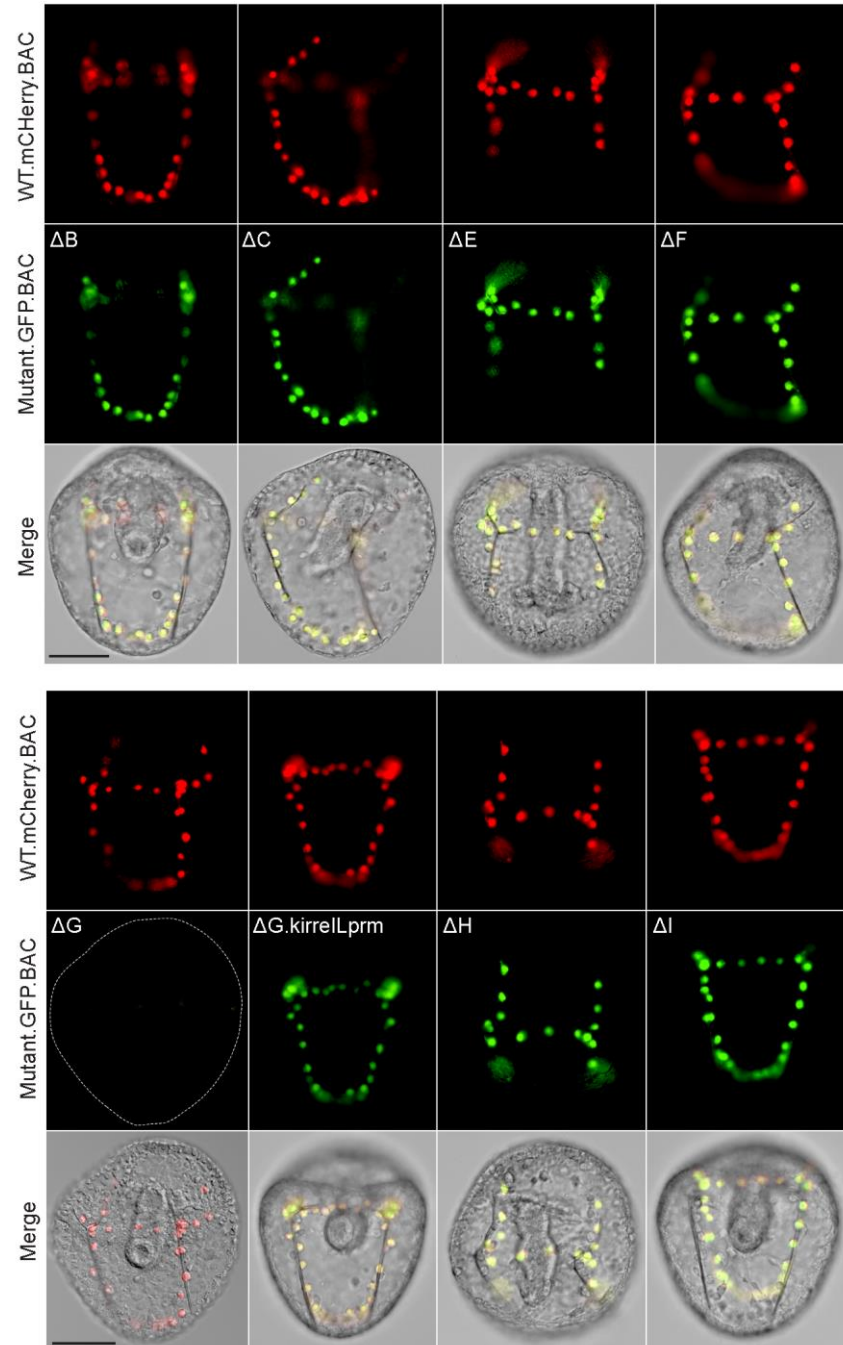

368

369 **Figure S5:** Spatial expression patterns of embryos co-injected with parental mCherry and mutant  
370 GFP BACs. Top rows: mCherry fluorescence. Middle rows: GFP fluorescence. Bottom rows:  
371 mCherry and GFP fluorescence overlaid onto DIC images. Scale bar: 50  $\mu m$ .

372 Cross-species analysis of echinoderm *kirreL* CREs

373 As the non-coding region directly upstream of the translational start site of *Sp-*  
374 *kirreL* was found to contain transcriptional control elements, we asked whether  
375 sequences directly upstream of *kirreL* genes from other echinoderm classes might  
376 contain conserved CREs that have activity in *S. purpuratus* PMCs. We cloned non-coding  
377 sequences upstream of *kirreL* genes from *Eucidaris tribuloides* (pencil urchin),  
378 *Parastichopus parvimensis* (sea cucumber), *Patiria miniata* (sea star), *Acanthaster planci*  
379 (crown-of-thorns starfish), *Ophionereis fasciata* (brittle star), and *Anneissia japonica*  
380 (feather star) into the *EpGFPII* plasmid and injected them into fertilized *S. purpuratus*  
381 eggs (**Figure 6A**). Remarkably, we found that all six drove GFP expression in sea urchin  
382 embryos, with five out of six exhibiting strong GFP expression selectively in PMCs (**Figure**  
383 **6B**). Taken together, these observations indicate that *kirreL* CREs across echinoderm  
384 species are highly conserved. We found it particularly striking that *kirreL* CREs from  
385 deeply divergent echinoderm species that do not form embryonic or larval skeletons (sea  
386 stars and feather stars) drive PMC-selective GFP expression in sea urchin embryos.

387 Although *KirreL* has been shown to be an important morphoeffecter gene in the  
388 sea urchin embryo, where it plays an essential role in PMC-PMC fusion, its expression in  
389 adult sea urchins has not been examined. We observed *Lv-kirreL* expression in the  
390 skeletogenic centers of the adult rudiment and in the spine of five-week-old juvenile sea  
391 urchins (**Figure 6B**). The expression pattern of *Lv-kirreL* was very similar to that of *Lv-*  
392 *msp130r2*, a highly expressed biomineralization gene (**Figure S6B**). In contrast,  
393 expression of *Pm-kirreL* was not detected during early embryonic and larval development  
394 in *P. miniata*, which does not form a larval skeleton (**Figure 6C**). *Pm-kirreL* is, however,  
395 expressed in the developing adult rudiment in pre-metamorphic, late-stage sea star larva  
396 and in the adult skeletogenic centers in juvenile sea stars (**Figure 6D**). As a control, we  
397 showed *Pm-ets1* expression in the mesenchyme cells during early development and an  
398 expression pattern in the adult rudiment and skeletogenic centers in juvenile sea stars  
399 that closely resembled that of *Pm-kirreL* (**Figure S6C**).



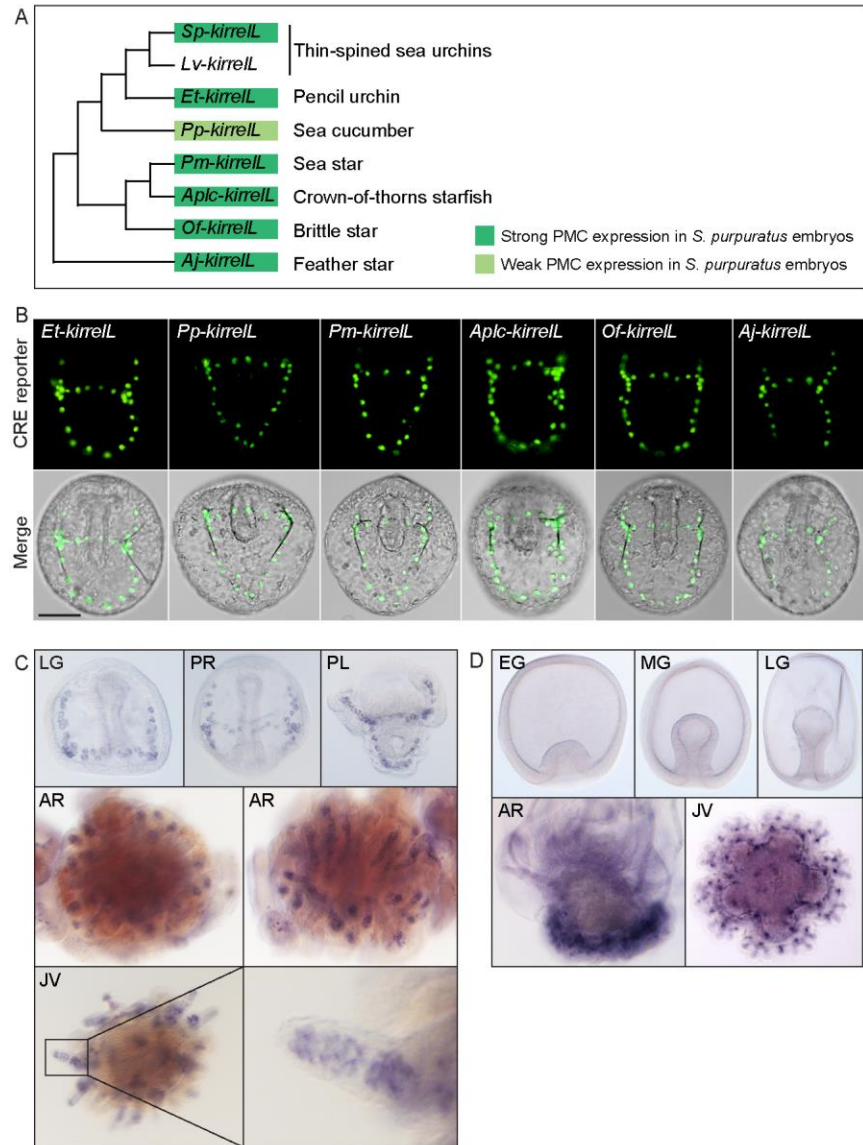

400

401 **Figure 6:** Cross-species analysis of *kirrell* CREs from diverse members of the echinoderm  
 402 phylum. (A) Phylogenetic relationships of *kirrell* genes based on the consensus view of  
 403 evolutionary relationships among echinoderms. Branch lengths are not drawn to scale. Box colors  
 404 correspond to expression of GFP in *S. purpuratus* embryos, driven by non-coding sequences  
 405 upstream of *kirrell* genes of *Eucladaris tribuloides* (Et-*kirrell*), *Parastichopus parvimensis* (Pp-  
 406 *kirrell*), *Patiria miniata* (Pm-*kirrell*), *Acanthaster planci* (Aplc-*kirrell*), *Ophionereis fasciata* (Of-  
 407 *kirrell*), and *Anneissia japonica* (Aj-*kirrell*). Criteria for strong and weak PMC expression are  
 408 defined in Figure 2. (B) Spatial expression patterns of GFP reporter constructs containing *kirrell*  
 409 CREs from other echinoderm species in *S. purpuratus* embryos at 48 hpf. Top row: GFP  
 410 fluorescence. Bottom row: GFP fluorescence overlaid onto DIC images. Scale bar: 50  $\mu$ m. (C)  
 411 Representative WMISH images showing *Lv-kirrell* expression during *L. variegatus* development.  
 412 (D) *Pm-kirrell* expression during *P. miniata* development. EG, early gastrula; MG, mid-gastrula;  
 413 LG, late gastrula; PR, prism stage; PL, pluteus larva; AR, adult rudiment; JV, juvenile stage.

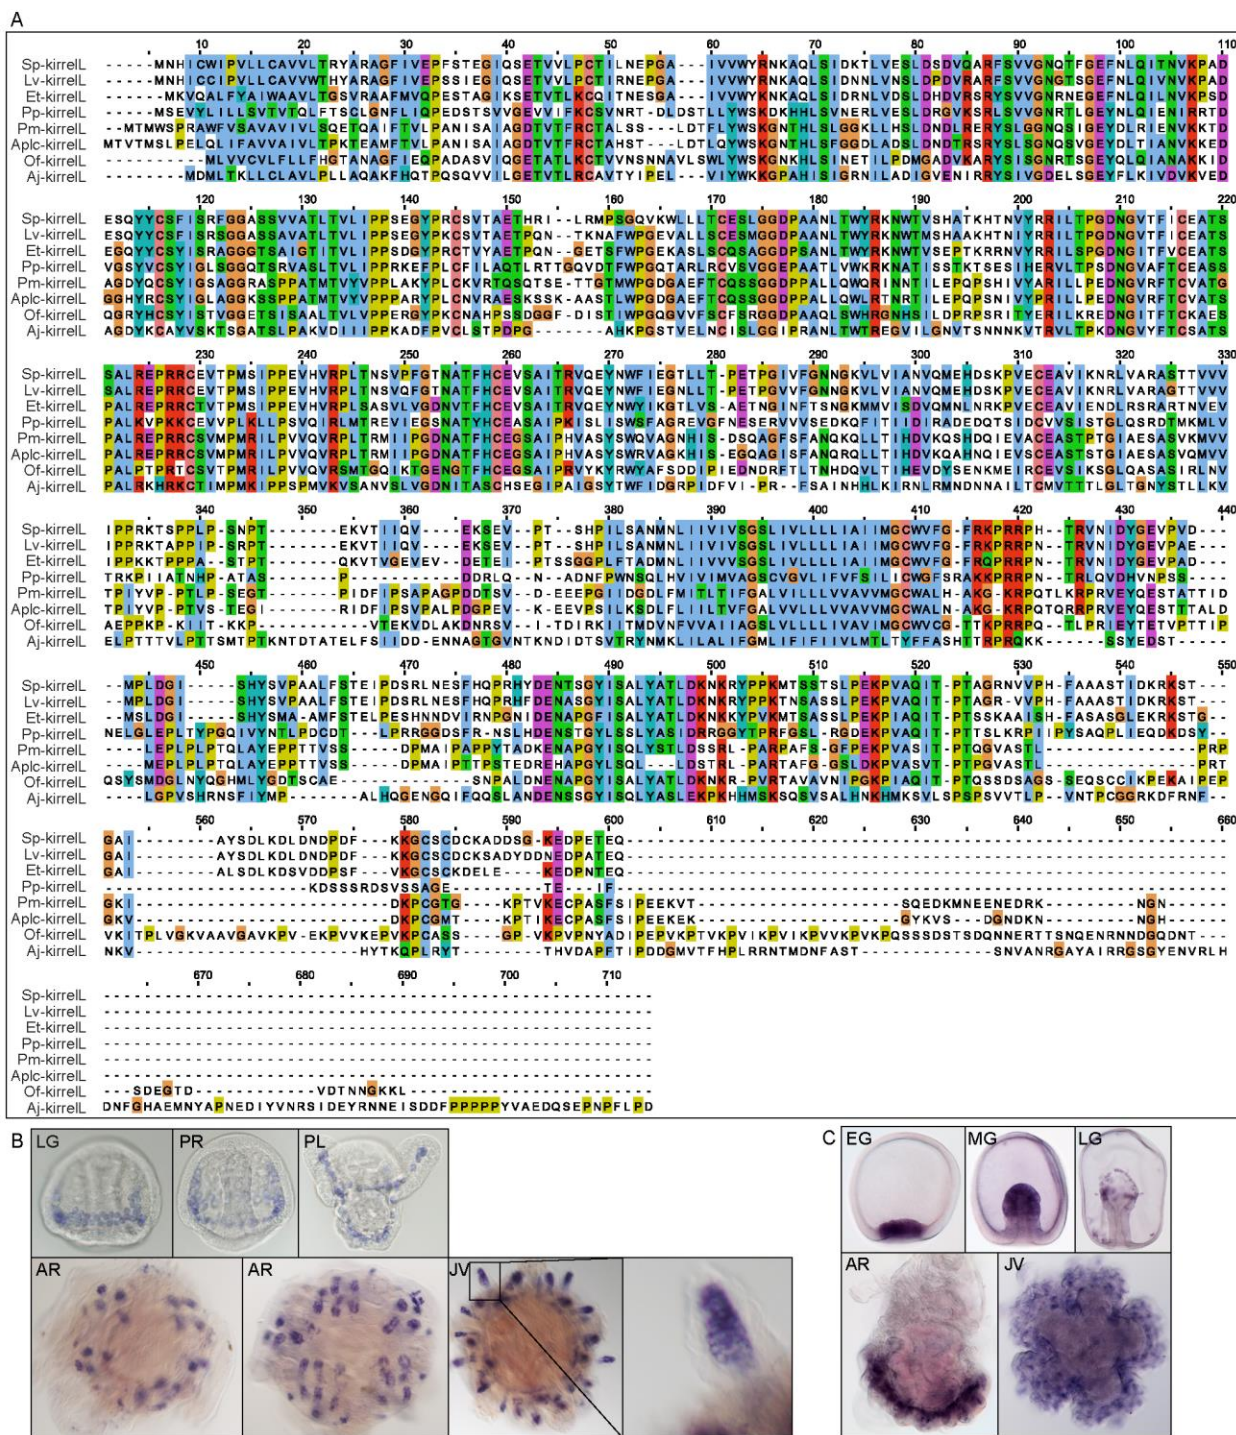

414  
 415 **Figure S6:** Alignment of echinoderm KirrelL proteins and representative WISH images of  
 416 positive control probes. (A) Clustal alignment of echinoderm KirrelL proteins from *Eucladius*  
 417 *tribuloides* (Et-kirrelL), *Parastichopus parvimensis* (Pp-kirrelL), *Patiria miniata* (Pm-kirrelL),  
 418 *Acanthaster planci* (Aplc-kirrelL), *Ophionereis fasciata* (Of-kirrelL), and *Anneissia japonica* (Aj-  
 419 kirrelL). Colors correspond to the Clustal default residue coloring scheme. (B) *Lv-msp130r2*  
 420 expression during *L. variegatus* development. (C) *Pm-ets1* expression during *P. miniata*



421 development. EG, early gastrula; MG, mid-gastrula; LG, late gastrula; PR, prism stage; PL,  
422 pluteus larva; AR, adult rudiment; JV, juvenile stage.

423

#### 424 Dissection of a candidate adult skeletogenic CRE

425 As sea stars do not form a larval skeleton but express *kirreLL* specifically in adult  
426 skeletogenic centers, we exploited the activity of the *Pm-kirreLL* CRE in sea urchin  
427 embryos as a potential proxy for identifying transcriptional inputs that ordinarily control  
428 this gene in adult echinoderms (see Discussion). We performed truncations and  
429 mutations of the regulatory regions upstream of the *Pm-kirreLL* gene to identify direct  
430 transcriptional inputs (**Figure 7**). Subdivision of the ~4 kb *Pm-kirreLL* regulatory region  
431 showed that activity was restricted to the proximal region (Pm2), and further analysis  
432 revealed that a 614 bp region (PmG) that was sufficient to drive strong PMC-specific GFP  
433 expression in *S. purpuratus* embryos (**Figure 7B and Figure S7A**). Phylogenetic  
434 footprinting of genomic sequences from *P. miniata* and the closely related crown-of-thorns  
435 starfish (*A. planci*) showed substantial similarity in this region (**Figure 7A**). We performed  
436 mutational analysis of the PmG element and found that this CRE receives positive inputs  
437 from both Alx1 and Ets1 (**Figure 7C and Figure S7B**), similar to the *Sp-kirreLL* C and  
438 G.ATAC elements. We next asked whether PmG1 and PmG2 elements, which are  
439 located near the *Pm-kirreLL* transcriptional start site, could interact with distal *Sp-kirreLL*  
440 elements, thereby substituting for the endogenous *Sp-kirreLL* promoter. For this analysis,  
441 we generated chimeric *EpGFPII* reporter constructs that contained the sea urchin *Sp-*  
442 *kirreLL* element C (SpC) adjacent to the sea star PmG1 or PmG2 element (**Figure 7D**).  
443 We found that PmG1 and PmG2 were both interchangeable with the *Sp-kirreLL* promoter  
444 and that interactions between SpC and PmG1 or PmG2 supported strong PMC-specific  
445 GFP expression in *S. purpuratus* embryos (**Figure S7C**). In a construct containing a  
446 PmG2 element with shuffled sequence, GFP expression was abolished. These  
447 observations highlight a striking conservation of sequence and function in *kirreLL*  
448 promoters from deeply divergent echinoderm species.

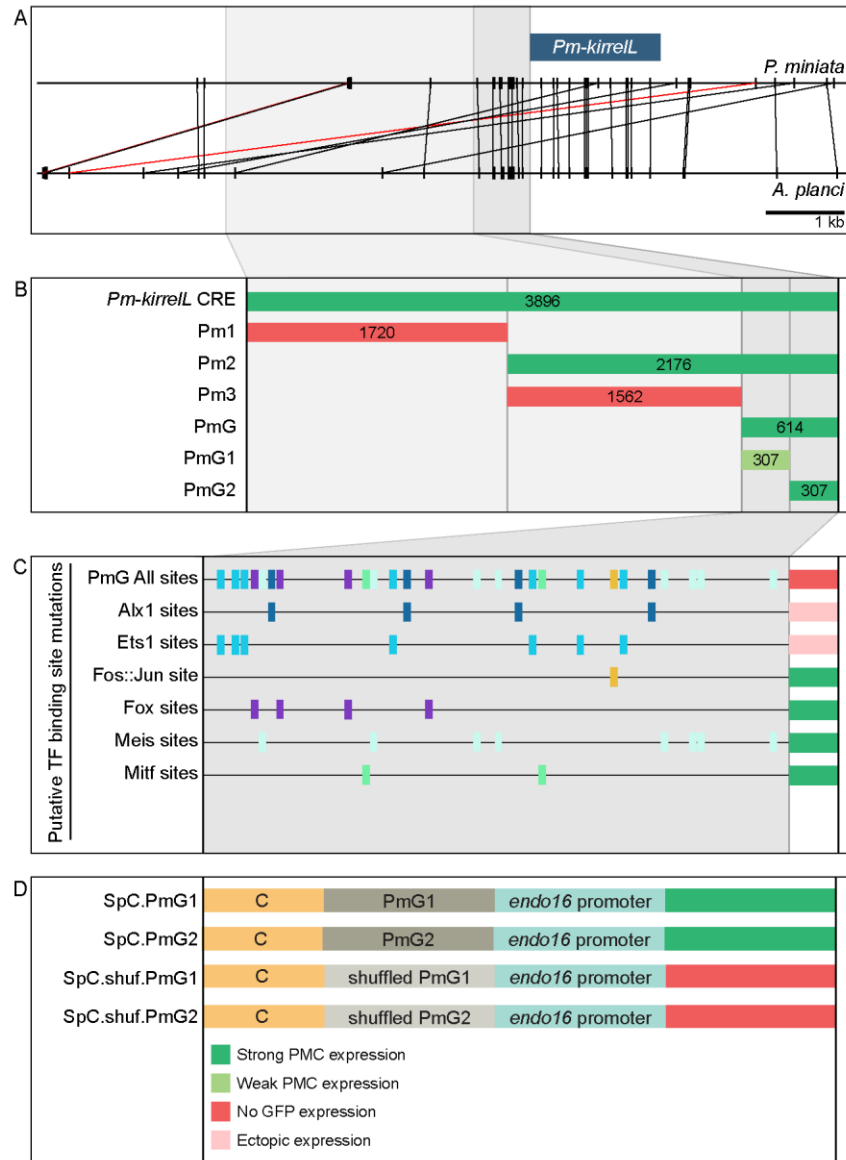

449

450 **Figure 7:** Functional analysis of non-coding genomic sequences upstream of *Pm-kirrelL* to  
 451 identify CREs. (A) Phylogenetic footprinting of genomic sequences near *P. miniata* and *A. planci*  
 452 *kirrelL* using GenePalette. Black lines indicate identical sequences of 15 bp or longer in the same  
 453 orientation while red lines indicate identical sequences of 15 bp or longer in the opposite  
 454 orientation. (B) Summary of GFP expression regulated by non-coding sequences upstream of the  
 455 *Pm-kirrelL* translational start site. (C) Summary of GFP expression driven by PmG element  
 456 mutants. (D) Summary of GFP expression regulated by chimeric reporter constructs containing  
 457 *Sp-kirrelL* element C and *Pm-kirrelL* G1 or G2 elements. Criteria for strong and weak PMC  
 458 expression are defined in Figure 2. Ectopic expression is defined as >10% of total injected  
 459 embryos expressing GFP, with majority exhibiting expressing in cells other than PMCs.

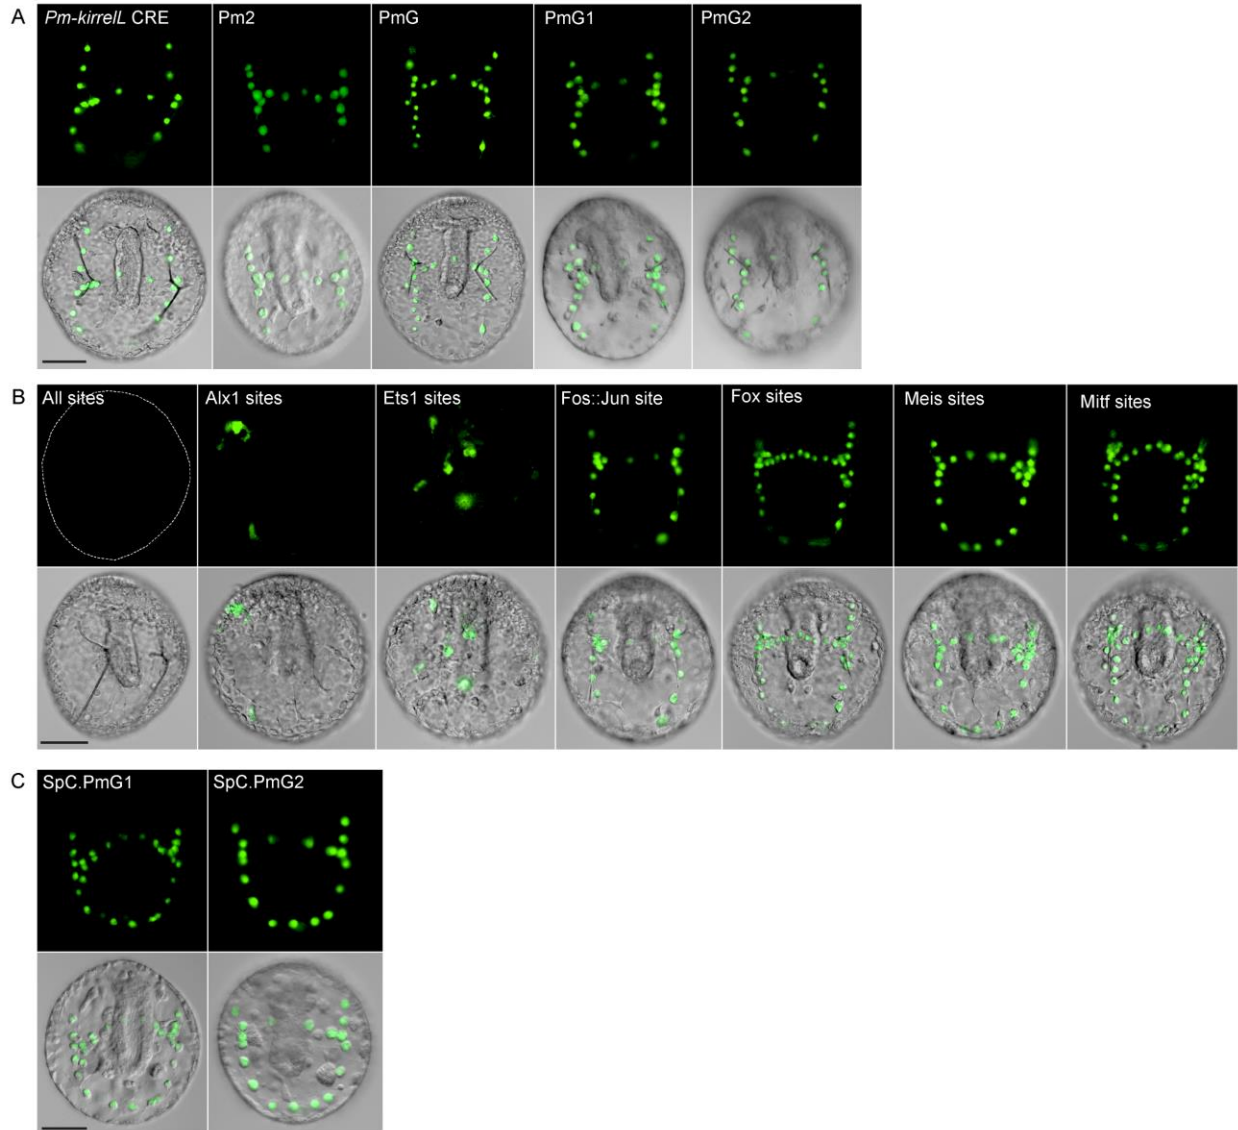

460

461 **Figure S7:** Sea star *Pm-kirrelL* CRE truncation and mutational analysis. (A) Spatial expression  
462 patterns of GFP reporter constructs containing *Pm-kirrelL* truncations in *S. purpuratus* embryos  
463 at 48 hpf. (B) Spatial expression patterns of GFP reporter constructs containing sea star PmG  
464 element mutants in *S. purpuratus* embryos at 48 hpf. (C) Spatial expression patterns of chimeric  
465 reporter constructs containing *Sp-kirrelL* element C and *Pm-kirrelL* G1 or G2 elements. Top rows:  
466 GFP fluorescence. Bottom rows: GFP fluorescence overlaid onto DIC images. Scale bar: 50  
467  $\mu\text{m}$ .

## 468 Discussion

### 469 Linking developmental GRNs to morphogenesis

470 Recent studies with echinoderms have elucidated the architecture of  
471 developmental GRNs, including the GRN deployed specifically in embryonic skeletogenic  
472 mesenchyme of sea urchins (Shashikant et al., 2018a). Although these studies have  
473 focused largely on interactions among regulatory genes that constitute the core of such  
474 networks, the importance of GRNs from a developmental perspective is that they underlie  
475 the dramatic anatomical changes that characterize embryogenesis (Ettensohn, 2013;  
476 Smith et al., 2018). In that respect, GRNs have considerable power in explaining the  
477 transformation of genotype into phenotype. Moreover, if GRNs are to be useful in  
478 understanding the evolution of morphology, currently a major goal of comparative GRN  
479 biology, the developmental mechanisms by which these genetic networks drive  
480 morphology must be addressed. This work seeks to partially fill this conceptual gap by  
481 elucidating the transcriptional control of *Sp-kirrell*, an effector gene required for cell-cell  
482 fusion, an important morphogenetic behavior of PMCs.

483

### 484 The cis-regulatory apparatus of *Sp-kirrell*

485 The combinatorial control of CRE function is important for driving complex gene  
486 expression patterns during animal development. In the present study, we identified key  
487 regulatory elements and transcription factor inputs that control *Sp-kirrell* expression.  
488 Using plasmid reporter constructs, we identified 7 CREs (elements B, C, E, F, G, H, and  
489 I) that were individually sufficient to drive strong PMC-specific GFP expression when  
490 placed adjacent to the native *Sp-kirrell* promoter. Most of these same elements failed to  
491 drive reporter expression at detectable levels, however, when cloned directly adjacent to  
492 the 140 bp *Sp-endo16* core promoter, a component of EpGFPII, a vector widely used for  
493 cis-regulatory analysis in sea urchins. As proximal promoter elements have been shown  
494 to tether more distal elements in other organisms (Calhoun et al., 2002), we hypothesize  
495 that such tethering activity is present in the 301 bp *Sp-kirrell* promoter element contained  
496 in element G. Tethering activity would also account for the fact the regulatory sites in the  
497 C element (i.e., those contained in C.ATAC and C.ChIP) must be in close proximity to the  
498 *Sp-endo16* promoter to activate transcription, while these same sites can function at a  
499 greater distance when working in concert with the endogenous *Sp-kirrell* promoter.  
500 These findings highlight the potential limitations of transgenic reporter assays that rely  
501 exclusively on exogenous and/or core promoters.

502 As multiple CREs were capable of supporting PMC-specific reporter expression in  
503 combination with the *Sp-kirrell* promoter, we performed BAC deletion analysis to  
504 determine the relative contributions of these elements to *Sp-kirrell* expression. We

505 quantified reporter expression using a newly developed, Nanostring-based assay that  
506 allowed us to measure the extent of transgene incorporation and reporter expression. We  
507 found that a single deletion of elements A through G entirely abolished GFP expression,  
508 even in the presence of the native *Sp-kirreLL* promoter, pointing to this region as the major  
509 regulatory apparatus of the gene and demonstrating that any CREs outside this region  
510 (including elements H and I) are insufficient to support transcription during  
511 embryogenesis. Consistent with plasmid reporter assays, our quantitative BAC analysis  
512 confirmed that elements C and G both make major contributions to *Sp-kirreLL* expression.  
513 Furthermore, we confirmed that the *Sp-kirreLL* native promoter is required for BAC  
514 reporter activity, also consistent with our plasmid reporter assays and with the hypothesis  
515 that the CREs are brought into physical contact with the promoter by chromatin looping  
516 during transcription. We observed that deletion of element H, which consisted of the *Sp-*  
517 *kirreLL* 3'-UTR, also resulted in decreased expression of the BAC reporter at 30 and 65  
518 hpf. Although an exogenous polyadenylation site was inserted at the 3' end of the reporter  
519 coding sequence during BAC recombineering and was therefore present in ftablall  
520 constructs, we cannot exclude the possibility that transcription extended beyond this site  
521 and that deletion of the 3'-UTR influenced the processing or stability of the *Sp-kirreLL*  
522 transcript rather than transcription.

523 Elements B, E, F, and I each drove PMC-specific reporter expression in plasmid  
524 constructs that contained the *Sp-kirreLL* promoter, but deletion of these elements  
525 individually from the *Sp-kirreLL* BAC did not quantitatively affect reporter expression at the  
526 developmental stages we examined. There are several possible explanations for this.  
527 First, these CREs may have no regulatory function *in vivo*. According to this view, the  
528 transcriptional activity of these elements in plasmid constructs was an artifact of bringing  
529 them in close proximity to the native *Sp-kirreLL* promoter. This view is inconsistent,  
530 however, with the fact that most of these elements (B, E, and I) contain other signatures  
531 of enhancer activity. All three elements are hyper-accessible in PMCs relative to other  
532 cell types at 24 hpf as assayed by ATAC-seq, and elements E and I are also associated  
533 with eRNA signal during early development (**Fig. 1**). Moreover, these elements exhibited  
534 some degree of promoter specificity in our reporter assays; i.e., they were active in  
535 combination with the *Sp-kirreLL* promoter but not the *Sp-endo16* core promoter. These  
536 findings suggest that some or all of these elements ordinarily have a regulatory function.  
537 They may modulate the precision of *Sp-kirreLL* expression during early development in  
538 subtle ways that our assays did not detect (Lagha et al., 2012) or they may be entirely  
539 redundant; i.e., deletion of any one of these elements may result in the complete  
540 assumption of its function by other elements. This might be the case, for example, if  
541 functionally equivalent CREs ordinarily share the *Sp-kirreLL* promoter. Lastly, although  
542 these elements are associated with eRNA expression and cell type-specific accessibility  
543 early in embryogenesis, their primary function may be to regulate *Sp-kirreLL* expression  
544 during stages of development later than those assayed in this study.



## 545 Co-regulation of elements C and G by Alx1 and Ets1

546 The results of both plasmid- and BAC-based reporter assays showed that  
547 elements C and G provide crucial inputs into *Sp-kirreLL*. Detailed dissection of these key  
548 elements identified consensus Ets1 and Alx1 binding sites that were essential for activity.  
549 This finding was consistent with previous evidence that perturbation of *alx1* or *ets1*  
550 function using antisense morpholinos results in a dramatic reduction of *Sp-kirreLL*  
551 expression (Rafiq et al., 2014). Moreover, ChIP-seq studies have shown that Alx1 binds  
552 directly to both elements (Khor et al., 2019). We cannot, however, exclude the possibility  
553 that other ETS and homeodomain family members expressed in PMCs (e.g., Erg and  
554 Alx4) also bind to these sites. Interestingly, although paired-class homeodomain proteins  
555 (including Alx1-related proteins found in vertebrates) are thought to regulate transcription  
556 primarily through their binding to palindromic sites that contain inverted TAAT sequences  
557 (e.g., ATTANNNTAAT), we identified a half site (ATTA) in element C that was required  
558 for activity. This finding supports other recent work which has shown that half sites play  
559 a more prominent role in the transcriptional activity of Alx1 than was previously  
560 appreciated (Guerrero-Santoro et al., 2021).

561 Based on gene knockdown studies and the epistatic gene relationships they  
562 reveal, Oliveri et al. (2008) proposed that several PMC effector genes are regulated  
563 through a feed-forward circuit involving Alx1 and Ets1. They showed that Ets1 positively  
564 regulates *alx1* and that both regulatory inputs are necessary to drive expression of several  
565 biomineralization-related genes. Our findings support such a model and extend it by  
566 demonstrating that the topology of this feed-forward regulation is very simple- both Alx1  
567 and Ets1 provide direct, positive inputs into CREs associated with *Sp-kirreLL*. We  
568 identified dual, direct inputs into two different CREs, one associated with the promoter  
569 (element G) and a more distal element (element C). Evidence from other recent studies  
570 suggest that direct co-regulation by Alx1 and Ets1 is a widespread mechanism for  
571 controlling PMC effector gene expression. Genome-wide analysis of Sp-Alx1 ChIP-seq  
572 peaks located near effector gene targets showed that both Alx1 and Ets1 consensus  
573 binding sites were highly enriched in these regions (Khor et al., 2019) and both Alx1 and  
574 Ets1 binding sites are enriched in regions of chromatin that are hyper-accessible in PMCs  
575 relative to other cell types (Shashikant et al., 2018b). Our analysis of *Sp-kirreLL* reveals  
576 that feed-forward regulation by Alx1 and Ets1 controls not only the expression of  
577 biomineralization-related genes but also genes that regulate PMC behavior, thereby  
578 integrating these cellular activities.

579 Davidson (1986) proposed that sea urchins, ascidians, nematodes, and several  
580 other animal groups develop by a so-called “Type I” mechanism, a mode of development  
581 characterized by the early embryonic expression of terminal differentiation genes. A  
582 prediction of this model is that Type I embryos deploy developmental GRNs that are  
583 relatively shallow; i.e., there are few regulatory layers between cell specification and cell

584 differentiation. The *cis*-regulatory control of *Sp-kirreL* by Alx1 and Ets1 supports this  
585 prediction; both transcription factors are activated during early embryogenesis and  
586 provide direct, positive inputs into *Sp-kirreL*. Although mutations of other putative  
587 transcription factor binding sites in elements C and G did not result in any noticeable  
588 effects on reporter expression in our studies, it should be noted that perdurance of GFP  
589 mRNA or protein following activation by early regulatory inputs such as Alx1 and Ets1  
590 might have masked effects of such mutations on later stages of embryogenesis.

591

## 592 Evolutionary conservation of echinoderm kirreL CREs

593 All adult echinoderms have elaborate, calcitic endoskeletons, but larval skeletal  
594 elements are found only in echinoids, ophiuroids, and holothuroids (the latter form only a  
595 very rudimentary larval skeleton). It is widely believed that the adult skeleton was present  
596 in the most recent common ancestor of all echinoderms and that larval skeletons arose  
597 subsequently through a developmental re-deployment of the adult program (see reviews  
598 by Cary and Hinman, 2017; Koga et al., 2014; Shashikant et al., 2018a). It is debated,  
599 however, whether this re-deployment occurred only once, with a subsequent loss of larval  
600 skeletons in asteroids, or more than once, with larval skeletons appearing independently  
601 in several groups. Our studies establish *kirreL* as a component of the ancestral  
602 echinoderm skeletogenic GRN, which also included *alx1*, *ets1*, and *vegfr-10-lg*  
603 (Erkenbrack and Thompson, 2019; Shashikant et al., 2018a).

604 There is abundant evidence that mutations in *cis*-regulatory sequences contribute  
605 to phenotypic evolution (Rebeiz and Tsiantis, 2017; Wray, 2007). At the same time, there  
606 are examples of evolutionarily conserved GRN topologies and transcription factor binding  
607 sites, often between relatively recently diverged taxa (e.g., mice and humans) but  
608 sometimes more deeply conserved (Rebeiz et al., 2015). In the present study, we showed  
609 that non-coding sequences upstream of the translational start sites of *kirreL* genes from  
610 a diverse collection of echinoderms supported PMC-specific reporter expression in sea  
611 urchin embryos. These echinoderms included a crinoid (*A. japonica*) and two sea stars  
612 (*A. planci* and *P. miniata*), taxa that diverged from echinoids 450-500 million years ago  
613 (Paul and Smith, 1984; Pisani et al., 2012). The deep evolutionary separation of these  
614 groups reveals a remarkable conservation of the *kirreL* regulatory apparatus over this  
615 vast time period. Although the amino acid sequences of KirreL proteins are well  
616 conserved within the phylum (**Figure S6A**), the sequences of the upstream regulatory  
617 regions we identified are more divergent. Despite limited nucleotide sequence  
618 conservation, dissection of the *Pm-kirreL* regulatory region provided evidence that in sea  
619 stars, as in sea urchins, Alx1 and Ets1 provide direct, positive inputs into *kirreL*.  
620 Moreover, we showed that regulatory elements directly upstream of the *Pm-kirreL*  
621 translation start site could substitute for the native *Sp-kirreL* promoter in supporting the

622 activity of the *S. purpuratus* C element, an effect that we hypothesize reflects a deep  
623 conservation of the binding sites and proteins that mediate CRE-promoter tethering.

624 The embryonic skeletogenic GRN of sea urchins has been elucidated in  
625 considerable detail, but analysis of the ancestral, adult program has thus far been limited  
626 to comparative gene expression studies, as there are several technical hurdles to  
627 molecular perturbations of adult echinoderms. Because sea stars do not express *kirreLL*  
628 at embryonic stages and lack a larval skeleton, but express *kirreLL* in adult skeletogenic  
629 centers, we conclude that the function of the sea star *kirreLL* cis-regulatory system is to  
630 control the transcription of this gene in the adult. Thus, our identification of Alx1 and Ets1  
631 inputs into the *Pm-kirreLL* regulatory region provides evidence that these inputs are  
632 required in skeletal cells of the adult sea star, consistent with the finding that both Ets1  
633 and Alx1 are expressed selectively by these cells (Gao and Davidson, 2008). We cannot  
634 exclude the possibility that the regulatory interactions we detected in the context of the *S.*  
635 *purpuratus* embryo are vestiges of an ancient, larval skeletogenic program that has since  
636 been lost in sea stars, if indeed this was the evolutionary trajectory of larval  
637 skeletogenesis within echinoderms. This interpretation, however, would require the  
638 evolutionary conservation of the relevant regulatory DNA sequences over a vast period  
639 of time despite their complete lack of function, a scenario that seems very unlikely. We  
640 propose instead that our findings provide the first glimpse of functional gene interactions  
641 in the ancestral, adult echinoderm skeletogenic program and highlight the remarkable  
642 conservation of this program in adults and embryos. They strongly support the view that  
643 co-option of the adult skeletogenic GRN into the embryo occurred, at least in part, via a  
644 heterochronic shift in the expression of Alx1 and Ets1. This would have been sufficient to  
645 transfer a large part of the skeletogenic GRN into the embryo, as the transcription of many  
646 key effector genes, including *kirreLL*, was already directly linked to Alx1 and Ets1  
647 expression. Direct analysis of CRE structure and function in the adult skeletogenic  
648 centers of sea stars and sea urchins will be required to more fully elucidate the  
649 architecture of the ancestral network.



650 **Supplemental tables**

651 **Supplemental Table S1:** Quantification of GFP expression patterns in embryos injected  
652 with reporter constructs.

653 **Supplemental Table S2:** Summary of NanoString analysis.

654 **Supplemental Table S3:** NanoString analysis probe target sequences.

## 655 **Materials and Methods**

### 656 **Animals**

657 Adult *Strongylocentrotus purpuratus* and *Patiria miniata* were acquired from Patrick Leahy  
658 (California Institute of Technology, USA). Adult *Lytechinus variegatus* were acquired from  
659 the Duke University Marine Laboratory (Beaufort, NC, USA) and from Pelagic Corp.  
660 (Sugarloaf Key, FL, USA). Spawning of gametes was induced by intracoelomic injection  
661 of 0.5 M KCl. *S. purpuratus* and *P. miniata* embryos were cultured in artificial seawater  
662 (ASW) at 15°C in temperature-controlled incubators while *L. variegatus* embryos were  
663 cultured at 19-24°C. Late-stage *L. variegatus* and *P. miniata* larvae were fed with  
664 *Rhodomonas lens* algae, accompanied by water changes every other day.

### 665 **Generation of cis-regulatory reporter constructs**

666 Phylogenetic footprinting between echinoderm kirrelL loci was performed using  
667 GenePalette with a sliding window size of 15 bp. GFP reporter constructs were generated  
668 by cloning putative CREs into the *EpGFPII* plasmid, which contains the basal promoter  
669 of *Sp-endo16* (Cameron et al., 2004). Putative *Sp-kirrelL* CREs were amplified from *S.*  
670 *purpuratus* genomic DNA using primers with restriction site overhangs (**see**  
671 **Supplemental Table S3**). CREs with mutations of putative transcription factor binding  
672 sites and putative CREs from echinoderm species were synthesized as gBlock gene  
673 fragments with flanking restriction sites by Integrated DNA Technologies (Coralville, IA,  
674 USA). Sequences of putative CREs from echinoderm species (other than sea urchins)  
675 were located 2-3 kb upstream of the kirrelL gene translational start sites.

### 676 **BAC recombineering**

677 *Sp-KirrelL* BAC-GFP reporter constructs were generated from a parental BAC (R3-28J10-  
678 14544) according to established recombineering protocols (Buckley et al., 2018). The  
679 recombineering cassettes were synthesized by Integrated DNA Technologies (Coralville,  
680 IA, USA). The cassettes contained GFP coding sequence, SV40 terminator sequence, a  
681 kanamycin resistance gene between two flippase recognition target (FRT) sites and  
682 flanking homologous arms. The recombineering cassettes were transformed into EL250  
683 cells carrying the parental BAC (pBACe3.6 vector harboring *Sp-kirrelL* and flanking  
684 genomic sequences) and recombinase genes were de-repressed via heat shock. EL250  
685 cells with recombinant BACs were selected based on kanamycin resistance. To remove  
686 the kanamycin resistance gene, expression of *flippase (flp)* recombinase enzyme was  
687 induced using L-(+)-arabinose and colonies with the kanamycin resistance gene removed  
688 were identified by replica plating. BACs without kanamycin resistance gene were  
689 subsequently electroporated and propagated in DH10 $\beta$  cells.

### 690 **DNA microinjection**

691 Microinjection of reporter constructs was performed following established protocols  
692 (Arnone et al., 2004). Prior to injection, reporter constructs were linearized and mixed with  
693 carrier DNA that was prepared by overnight HindIII digestion of *S. purpuratus* or *L.*  
694 *variegatus* genomic DNA. BAC and plasmid constructs were linearized with Ascl and KpnI  
695 restriction enzymes, respectively. Each injection solution contained 100 ng/μL linearized  
696 DNA, 500 ng/μL carrier DNA, 0.12 M KCl, 20% glycerol, 0.1% Texas Red dextran in  
697 DNase-free, sterile water. *S. purpuratus* embryos were cultured for 48 hpf and *L.*  
698 *variegatus* were cultured for 28 hpf before being mounted for live imaging. Embryos were  
699 scored to determine the total number of injected embryos (indicated by the presence of  
700 Texas Red dextran), the number of embryos showing PMC-specific GFP expression, the  
701 number of embryos showing PMC and ectopic GFP expression, and the number of  
702 embryos with only ectopic GFP expression.

### 703 NanoString analysis

704 Direct quantitative measurement of GFP and mCherry RNA transcripts and incorporated  
705 DNA was performed using the Nanostring nCounter Elements XT protocol. Briefly, a pair  
706 of target-specific oligonucleotide pairs (Probes A and B) complementary to each target  
707 gene and transcript were synthesized by Integrated DNA Technologies (Coralville, IA,  
708 USA). Probes A and B also included short tails complementary to NanoString Reporter  
709 Tags and Universal Capture Tags, respectively. RNA targets included GFP, mCherry,  
710 and several *S. purpuratus* housekeeping genes (*foxJ1*, *hlf*, *kazL*, and *rasprp3*) that  
711 represented a range of transcript abundances and that were expressed at constant levels  
712 over the developmental time window of interest. DNA targets included GFP, mCherry,  
713 several endogenous, single-copy genes (*hypp\_1164*, *hypp\_1901*, *hypp\_2956*, *hypp\_592*,  
714 *kirreLL*), and one multi-copy gene (*pmar1*). DNA probes were complementary to the non-  
715 coding DNA strand to avoid hybridization to RNA. Probe sequences are available in  
716 **Supplemental Table S3**. For detection, we used the NanoString Elements XT Reporter  
717 Tag Set-12 and Universal Capture Tag.

718 Embryos injected with parental and mutant BACs were harvested at 20, 30, 50 and 65  
719 hpf using the Qiagen AllPrep DNA/DNA micro kit. An additional on-column DNase  
720 treatment was included in the RNA recovery process to remove contaminating DNA.  
721 Genomic DNA extracted was sonicated using a Bioruptor Pico (Diagenode) for 6 minutes  
722 (30 seconds ON, 30 seconds OFF) at 4°C to obtain ~200 bp fragments (confirmed using  
723 an Agilent Bioanalyzer). Sonicated DNA was extracted using ethanol precipitation. GFP  
724 or mCherry RNA counts were first normalized to housekeeping transcript counts. DNA  
725 counts were normalized to single copy gene counts to obtain number of incorporated DNA  
726 per nucleus. To obtain RNA count per incorporated DNA for each sample, normalized  
727 RNA counts were divided by normalized incorporated DNA counts (**Supplemental Table**  
728 **S2 and S4**).

729 Whole-mount in situ hybridization

730 DNA templates for RNA probe synthesis were amplified with reverse primers that  
731 contained T3 promoter (**see Table S3**). Invitrogen MEGAscript T3 Transcription Kit was  
732 then used to amplify digoxigenin-labeled RNA from the DNA templates. Whole-mount in  
733 situ hybridization (WMISH) was performed as previously described (Ettensohn et al.,  
734 2007), with minor modifications. Embryos were collected fixed at the desired stage and  
735 fixed 4% PFA in artificial seawater (ASW) for 1 hour at room temperature. The embryos  
736 were then washed twice in ASW and permeabilized and stored in with 100% methanol.  
737 Embryos were then rehydrated and incubated with 1ng/ $\mu$ L RNA probe overnight at 55°C.  
738 The following day, the embryos were incubated in blocking buffer (1% BSA and 2% horse  
739 serum in PBST) and then in blocking buffer with 1:2000  $\alpha$ -DIG-AP antibody. Excess  
740 antibody was washed away and color reaction for alkaline phosphatase was carried out.

- 741 Amore G, Davidson EH. 2006. cis-Regulatory control of cyclophilin, a member of the ETS-DRI  
742 skeletogenic gene battery in the sea urchin embryo. *Developmental Biology* **293**:555–564.  
743 doi:10.1016/j.ydbio.2006.02.024
- 744 Arnone MI, Andrikou C, Annunziata R. 2016. Echinoderm systems for gene regulatory studies in  
745 evolution and development. *Current Opinion in Genetics & Development* **39**:129–137.  
746 doi:10.1016/j.gde.2016.05.027
- 747 Arnone MI, Dmochowski IJ, Gache C. 2004. Using Reporter Genes to Study cis-Regulatory  
748 ElementsMethods in Cell Biology. Elsevier. pp. 621–652. doi:10.1016/S0091-  
749 679X(04)74025-X
- 750 Baertsch R, Diekhans M, Kent WJ, Haussler D, Brosius J. 2008. Retrocopy contributions to the  
751 evolution of the human genome. *BMC Genomics* **9**:466. doi:10.1186/1471-2164-9-466
- 752 Buckley KM, Dong P, Cameron RA, Rast JP. 2018. Bacterial artificial chromosomes as  
753 recombinant reporter constructs to investigate gene expression and regulation in  
754 echinoderms. *Briefings in Functional Genomics* **17**:362–371. doi:10.1093/bfgp/elx031
- 755 Calhoun VC, Stathopoulos A, Levine M. 2002. Promoter-proximal tethering elements regulate  
756 enhancer-promoter specificity in the Drosophila Antennapedia complex. *Proceedings of  
757 the National Academy of Sciences* **99**:9243–9247. doi:10.1073/pnas.142291299
- 758 Cameron RA, Oliveri P, Wyllie J, Davidson EH. 2004. cis-Regulatory activity of randomly chosen  
759 genomic fragments from the sea urchin. *Gene Expression Patterns* **4**:205–213.  
760 doi:10.1016/j.modgep.2003.08.007
- 761 Cary GA, Hinman VF. 2017. Echinoderm development and evolution in the post-genomic era.  
762 *Developmental Biology* **427**:203–211. doi:10.1016/j.ydbio.2017.02.003
- 763 Cordaux R, Batzer MA. 2009. The impact of retrotransposons on human genome evolution. *Nat  
764 Rev Genet* **10**:691–703. doi:10.1038/nrg2640
- 765 Czarkwiani A, Dylus DV, Oliveri P. 2013. Expression of skeletogenic genes during arm  
766 regeneration in the brittle star *Amphiura filiformis*. *Gene Expression Patterns* **13**:464–472.  
767 doi:10.1016/j.gep.2013.09.002
- 768 Davidson EH. 1986. Gene activity in early development. Orlando: Academic Press.
- 769 Dermody TS, Kirchner E, Guglielmi KM, Stehle T. 2009. Immunoglobulin Superfamily Virus  
770 Receptors and the Evolution of Adaptive Immunity. *PLoS Pathog* **5**:e1000481.  
771 doi:10.1371/journal.ppat.1000481
- 772 Dylus DV, Czarkwiani A, Blowes LM, Elphick MR, Oliveri P. 2018. Developmental transcriptomics  
773 of the brittle star *Amphiura filiformis* reveals gene regulatory network rewiring in  
774 echinoderm larval skeleton evolution. *Genome Biol* **19**:26. doi:10.1186/s13059-018-1402-  
775 8
- 776 Erkenbrack EM, Thompson JR. 2019. Cell type phylogenetics informs the evolutionary origin of  
777 echinoderm larval skeletogenic cell identity. *Commun Biol* **2**:160. doi:10.1038/s42003-  
778 019-0417-3
- 779 Ettensohn CA. 2013. Encoding anatomy: Developmental gene regulatory networks and  
780 morphogenesis: Encoding Anatomy. *genesis* **51**:383–409. doi:10.1002/dvg.22380
- 781 Ettensohn CA, Dey D. 2017. KirrelL, a member of the Ig-domain superfamily of adhesion proteins,  
782 is essential for fusion of primary mesenchyme cells in the sea urchin embryo.  
783 *Developmental Biology* **421**:258–270. doi:10.1016/j.ydbio.2016.11.006

- 784 Etensohn CA, Illies MR, Oliveri P, De Jong DL. 2003. Alx1, a member of the Cart1/Alx3/Alx4  
785 subfamily of Paired-class homeodomain proteins, is an essential component of the gene  
786 network controlling skeletogenic fate specification in the sea urchin embryo. *Development*  
787 **130**:2917–2928. doi:10.1242/dev.00511
- 788 Etensohn CA, Kitazawa C, Cheers MS, Leonard JD, Sharma T. 2007. Gene regulatory networks  
789 and developmental plasticity in the early sea urchin embryo: alternative deployment of the  
790 skeletogenic gene regulatory network. *Development* **134**:3077–3087.  
791 doi:10.1242/dev.009092
- 792 Farré D, Martínez-Vicente P, Engel P, Angulo A. 2017. Immunoglobulin superfamily members  
793 encoded by viruses and their multiple roles in immune evasion. *Eur J Immunol* **47**:780–  
794 796. doi:10.1002/eji.201746984
- 795 Gao F, Davidson EH. 2008. Transfer of a large gene regulatory apparatus to a new developmental  
796 address in echinoid evolution. *Proceedings of the National Academy of Sciences*  
797 **105**:6091–6096. doi:10.1073/pnas.0801201105
- 798 Gao F, Thompson JR, Petsios E, Erkenbrack E, Moats RA, Bottjer DJ, Davidson EH. 2015.  
799 Juvenile skeletogenesis in anciently diverged sea urchin clades. *Developmental Biology*  
800 **400**:148–158. doi:10.1016/j.ydbio.2015.01.017
- 801 Guerrero-Santoro J, Khor JM, Açıkbaş AH, Jaynes JB, Etensohn CA. 2021. Analysis of the DNA-  
802 binding properties of Alx1, an evolutionarily conserved regulator of skeletogenesis in  
803 echinoderms. *Journal of Biological Chemistry* **297**:100901. doi:10.1016/j.jbc.2021.100901
- 804 Khor JM, Guerrero-Santoro J, Douglas W, Etensohn CA. 2021. Global patterns of enhancer  
805 activity during sea urchin embryogenesis assessed by eRNA profiling. *Genome Res*  
806 gr.275684.121. doi:10.1101/gr.275684.121
- 807 Khor JM, Guerrero-Santoro J, Etensohn CA. 2019. Genome-wide identification of binding sites  
808 and gene targets of Alx1, a pivotal regulator of echinoderm skeletogenesis. *Development*  
809 **146**:dev180653. doi:10.1242/dev.180653
- 810 Killian CE, Croker L, Wilt FH. 2010. SpSM30 gene family expression patterns in embryonic and  
811 adult biomineralized tissues of the sea urchin, *Strongylocentrotus purpuratus*. *Gene*  
812 *Expression Patterns* **10**:135–139. doi:10.1016/j.gep.2010.01.002
- 813 Koga H, Morino Y, Wada H. 2014. The echinoderm larval skeleton as a possible model system  
814 for experimental evolutionary biology: Evolution of Echinoderm Larval Skeleton. *genesis*  
815 **52**:186–192. doi:10.1002/dvg.22758
- 816 Kurokawa D, Kitajima T, Mitsunaga-Nakatsubo K, Amemiya S, Shimada H, Akasaka K. 1999.  
817 HpEts, an ets-related transcription factor implicated in primary mesenchyme cell  
818 differentiation in the sea urchin embryo. *Mechanisms of Development* **80**:41–52.  
819 doi:10.1016/S0925-4773(98)00192-0
- 820 Lagha M, Bothma JP, Levine M. 2012. Mechanisms of transcriptional precision in animal  
821 development. *Trends in Genetics* **28**:409–416. doi:10.1016/j.tig.2012.03.006
- 822 Logan CY, Miller JR, Ferkowicz MJ, McClay DR. 1999. Nuclear beta-catenin is required to specify  
823 vegetal cell fates in the sea urchin embryo. *Development* **126**:345–357.  
824 doi:10.1242/dev.126.2.345
- 825 Lyons DC, Kaltenbach SL, McClay DR. 2012. Morphogenesis in sea urchin embryos: linking  
826 cellular events to gene regulatory network states: Sea urchin gastrulation. *WIREs Dev Biol*  
827 **1**:231–252. doi:10.1002/wdev.18



- 828 Makabe KW, Kirchhamer CV, Britten RJ, Davidson EH. 1995. Cis-regulatory control of the SM50  
829 gene, an early marker of skeletogenic lineage specification in the sea urchin embryo.  
830 *Development* **121**:1957–1970.
- 831 Mann K, Poustka AJ, Mann M. 2008. The sea urchin (*Strongylocentrotus purpuratus*) test and  
832 spine proteomes. *Proteome Sci* **6**:22. doi:10.1186/1477-5956-6-22
- 833 Mann K, Wilt FH, Poustka AJ. 2010. Proteomic analysis of sea urchin (*Strongylocentrotus*  
834 *purpuratus*) spicule matrix. *Proteome Sci* **8**:33. doi:10.1186/1477-5956-8-33
- 835 Mathelier A, Fornes O, Arenillas DJ, Chen C, Denay G, Lee J, Shi W, Shyr C, Tan G, Worsley-  
836 Hunt R, Zhang AW, Parcy F, Lenhard B, Sandelin A, Wasserman WW. 2016. JASPAR  
837 2016: a major expansion and update of the open-access database of transcription factor  
838 binding profiles. *Nucleic Acids Res* **44**:D110–D115. doi:10.1093/nar/gkv1176
- 839 Nishimura Y, Sato T, Morita Y, Yamazaki A, Akasaka K, Yamaguchi M. 2004. Structure,  
840 regulation, and function of micro1 in the sea urchin *Hemicentrotus pulcherrimus*. *Dev*  
841 *Genes Evol* **214**:525–536. doi:10.1007/s00427-004-0442-0
- 842 Oliveri P, Carrick DM, Davidson EH. 2002. A Regulatory Gene Network That Directs Micromere  
843 Specification in the Sea Urchin Embryo. *Developmental Biology* **246**:209–228.  
844 doi:10.1006/dbio.2002.0627
- 845 Oliveri P, Tu Q, Davidson EH. 2008. Global regulatory logic for specification of an embryonic cell  
846 lineage. *Proceedings of the National Academy of Sciences* **105**:5955–5962.  
847 doi:10.1073/pnas.0711220105
- 848 Paul CRC, Smith AB. 1984. The Early Radiation and Phylogeny of Echinoderms. *Biological*  
849 *Reviews* **59**:443–481. doi:10.1111/j.1469-185X.1984.tb00411.x
- 850 Peng CJ, Wikramanayake AH. 2013. Differential Regulation of Disheveled in a Novel Vegetal  
851 Cortical Domain in Sea Urchin Eggs and Embryos: Implications for the Localized  
852 Activation of Canonical Wnt Signaling. *PLoS ONE* **8**:e80693.  
853 doi:10.1371/journal.pone.0080693
- 854 Peter IS, Davidson EH. 2015. Genomic control process: development and evolution. London, UK ;  
855 San Diego, CA, USA: Academic Press is an imprint of Elsevier.
- 856 Pisani D, Feuda R, Peterson KJ, Smith AB. 2012. Resolving phylogenetic signal from noise when  
857 divergence is rapid: A new look at the old problem of echinoderm class relationships.  
858 *Molecular Phylogenetics and Evolution* **62**:27–34. doi:10.1016/j.ympev.2011.08.028
- 859 Rafiq K, Shashikant T, McManus CJ, Etensohn CA. 2014. Genome-wide analysis of the  
860 skeletogenic gene regulatory network of sea urchins. *Development* **141**:2542–2542.  
861 doi:10.1242/dev.112763
- 862 Rebeiz M, Patel NH, Hinman VF. 2015. Unraveling the Tangled Skein: The Evolution of  
863 Transcriptional Regulatory Networks in Development. *Annu Rev Genom Hum Genet*  
864 **16**:103–131. doi:10.1146/annurev-genom-091212-153423
- 865 Rebeiz M, Tsiantis M. 2017. Enhancer evolution and the origins of morphological novelty. *Current*  
866 *Opinion in Genetics & Development* **45**:115–123. doi:10.1016/j.gde.2017.04.006
- 867 Richardson W, Kitajima T, Wilt F, Benson S. 1989. Expression of an embryonic spicule matrix  
868 gene in calcified tissues of adult sea urchins. *Developmental Biology* **132**:266–269.  
869 doi:10.1016/0012-1606(89)90222-4

- 870 Shashikant T, Khor JM, Etensohn CA. 2018a. From genome to anatomy: The architecture and  
871 evolution of the skeletogenic gene regulatory network of sea urchins and other  
872 echinoderms. *genesis* **56**:e23253. doi:10.1002/dvg.23253
- 873 Shashikant T, Khor JM, Etensohn CA. 2018b. Global analysis of primary mesenchyme cell cis-  
874 regulatory modules by chromatin accessibility profiling. *BMC Genomics* **19**:206.  
875 doi:10.1186/s12864-018-4542-z
- 876 Smith AF, Posakony JW, Rebeiz M. 2017. Automated tools for comparative sequence analysis of  
877 genic regions using the GenePalette application. *Developmental Biology* **429**:158–164.  
878 doi:10.1016/j.ydbio.2017.06.033
- 879 Smith SJ, Rebeiz M, Davidson L. 2018. From pattern to process: studies at the interface of gene  
880 regulatory networks, morphogenesis, and evolution. *Current Opinion in Genetics &*  
881 *Development* **51**:103–110. doi:10.1016/j.gde.2018.08.004
- 882 Sun Z, Etensohn CA. 2014. Signal-dependent regulation of the sea urchin skeletogenic gene  
883 regulatory network. *Gene Expression Patterns* **16**:93–103. doi:10.1016/j.gep.2014.10.002
- 884 Tu Q, Cameron RA, Davidson EH. 2014. Quantitative developmental transcriptomes of the sea  
885 urchin *Strongylocentrotus purpuratus*. *Developmental Biology* **385**:160–167.  
886 doi:10.1016/j.ydbio.2013.11.019
- 887 Walters J, Binkley E, Haygood R, Romano LA. 2008. Evolutionary analysis of the cis-regulatory  
888 region of the spicule matrix gene SM50 in strongylocentrotid sea urchins. *Developmental*  
889 *Biology* **315**:567–578. doi:10.1016/j.ydbio.2008.01.007
- 890 Weitzel HE, Illies MR, Byrum CA, Xu R, Wikramanayake AH, Etensohn CA. 2004. Differential  
891 stability of  $\beta$ -catenin along the animal-vegetal axis of the sea urchin embryo mediated by  
892 dishevelled. *Development* **131**:2947–2956. doi:10.1242/dev.01152
- 893 Wray GA. 2007. The evolutionary significance of cis-regulatory mutations. *Nat Rev Genet* **8**:206–  
894 216. doi:10.1038/nrg2063
- 895
